# Supplementary material for: 2-Quinoxalinol diamine Cu(ii) complex: facilitating catalytic oxidation through dual mechanisms
Source: Royal Society of Chemistry journal article supplement (doi:10.1039/c4dt01562b), 2014-07-28
Supplement: c4dt01562b1.pdf [file c4dt01562b1.pdf]

## 2-Quinoxalinol Diamine Cu(II) Complex: Facilitating Catalytic Oxidation Through Dual Mechanisms

Yuancheng Li, TaeBum Lee, Kushan Weerasiri, Tanyu Wang, Emily E. Buss, Michael L. McKee, Anne E. V. Gorden\*

Department of Chemistry and Biochemistry, College of Science and Mathematics, Auburn University,  
Auburn, Alabama 36849-5319, United States  
gordeae@auburn.edu

### SUPPORTING INFORMATION

#### Table of Contents

|                          |       |
|--------------------------|-------|
| GC-MS Spectrum           | S2    |
| Theoretical Calculations | S3-33 |
| Reference Cited          | S33   |

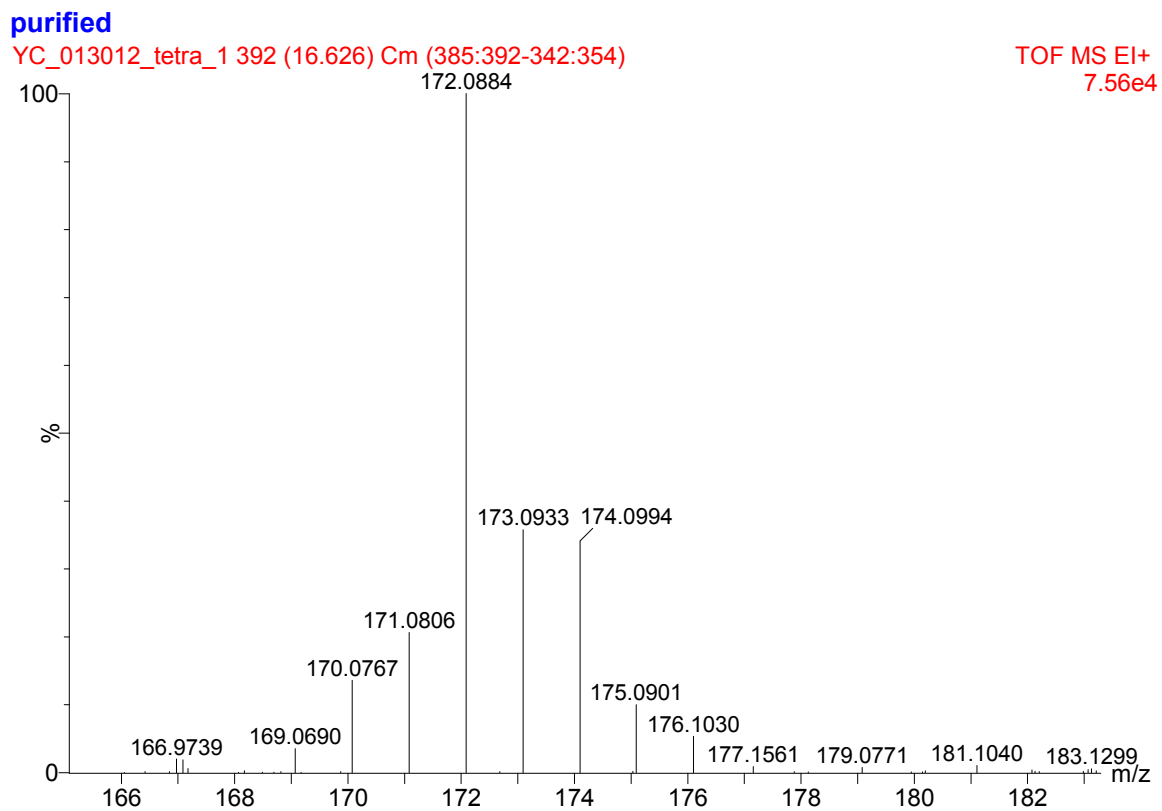

**Figure S1.** ESI-MS of reaction solution using regular TBHP as the oxidant under  $^{18}\text{O}_2$  atmosphere.

## Theoretical Calculation

Point groups, Electronic States, Total Energies (hartrees) at B3LYP/6-311+G(2df,p), Zero-Point Energies (kcal/mol), Thermal Corrections (kcal/mol), Entropies (cal/mol·K) at B3LYP/6-31G(d) and Solvation Free Energies (kcal/mol) at B3LYP/6-311+G(2df,p)

|                                  | PG <sup>a</sup> | ES <sup>b</sup>                          | SCF Energy  | ZPE <sup>c</sup><br>(NIF) | TC <sup>d</sup> | S <sup>e</sup> | Solvation<br>Free Energy <sup>f</sup> |
|----------------------------------|-----------------|------------------------------------------|-------------|---------------------------|-----------------|----------------|---------------------------------------|
| <b>4</b>                         | C <sub>1</sub>  | <sup>2</sup> A                           | -2896.86773 | 233.53(0)                 | 17.54           | 182.47         | -26.54                                |
| <b>7</b>                         | C <sub>2</sub>  | <sup>1</sup> A                           | -234.72318  | 92.26(0)                  | 4.03            | 72.37          | -4.22                                 |
| <b>4,7TS9,14</b>                 | C <sub>1</sub>  | <sup>2</sup> A                           | -3131.54240 | 321.89(1)                 | 22.13           | 220.21         | -24.50                                |
| <b>9</b>                         | C <sub>s</sub>  | <sup>2</sup> A''                         | -234.08297  | 83.47(0)                  | 4.04            | 74.98          | -4.40                                 |
| <b>14</b>                        | C <sub>1</sub>  | <sup>1</sup> A                           | -2897.51628 | 239.88(0)                 | 18.21           | 186.70         | -24.04                                |
| <b>9,14TS15</b>                  | C <sub>1</sub>  | <sup>2</sup> A                           | -3131.59951 | 323.35(1)                 | 22.68           | 227.84         | -27.76                                |
| <b>15</b>                        | C <sub>1</sub>  | <sup>2</sup> A                           | -3131.66672 | 326.69(0)                 | 22.37           | 221.44         | -26.43                                |
| <b>16</b>                        | C <sub>1</sub>  | <sup>2</sup> A                           | -3131.67303 | 327.02(0)                 | 22.15           | 220.45         | -21.99                                |
| <b>16TS17</b>                    | C <sub>1</sub>  | <sup>2</sup> A                           | -3131.65941 | 326.09(1)                 | 21.96           | 218.80         | -20.86                                |
| <b>17</b>                        | C <sub>1</sub>  | <sup>2</sup> A                           | -3131.67667 | 326.78(0)                 | 22.35           | 222.84         | -24.07                                |
| <b>17TS18</b>                    | C <sub>1</sub>  | <sup>2</sup> A                           | -3131.67855 | 326.60(1)                 | 21.96           | 221.07         | -24.48                                |
| <b>18</b>                        | C <sub>1</sub>  | <sup>2</sup> A                           | -3131.68971 | 327.31(0)                 | 21.99           | 223.11         | -25.31                                |
| <b>19</b>                        | C <sub>1</sub>  | <sup>1</sup> A                           | -309.96884  | 95.00(0)                  | 4.71            | 79.31          | -7.11                                 |
| <b>20</b>                        | C <sub>1</sub>  | <sup>2</sup> A                           | -2821.69973 | 230.93(0)                 | 17.07           | 178.55         | -23.16                                |
| <b>4TS5,6</b>                    | C <sub>1</sub>  | <sup>2</sup> A                           | -2896.79585 | 230.05(1)                 | 18.22           | 189.72         | -29.47                                |
| <b>5</b>                         | C <sub>1</sub>  | <sup>2</sup> A                           | -115.09697  | 23.10(0)                  | 2.48            | 56.57          | -3.30                                 |
| <b><sup>3</sup>6</b>             | C <sub>1</sub>  | <sup>3</sup> A                           | -2781.70645 | 206.23(0)                 | 15.70           | 168.16         | -28.49                                |
| <b>6<sup>g</sup></b>             | C <sub>1</sub>  | <sup>1</sup> A                           | -2781.70155 | 206.20(0)                 | 15.71           | 166.19         | -29.18                                |
| <b>5,7TS8,9</b>                  | C <sub>1</sub>  | <sup>2</sup> A                           | -349.81611  | 113.96(1)                 | 6.35            | 96.94          | -6.69                                 |
| <b>8</b>                         | C <sub>s</sub>  | <sup>1</sup> A'                          | -115.76963  | 32.30(0)                  | 2.66            | 56.74          | -3.62                                 |
| <b>9</b>                         | C <sub>s</sub>  | <sup>2</sup> A''                         | -234.08297  | 83.47(0)                  | 4.04            | 74.98          | -4.40                                 |
| <b><sup>3</sup>6,7TS9,10</b>     | C <sub>1</sub>  | <sup>3</sup> A                           | -3016.42769 | 295.57(1)                 | 19.99           | 206.76         | -28.56                                |
| <b>6,7TS9,10<sup>g</sup></b>     | C <sub>1</sub>  | <sup>1</sup> A                           | -3016.42390 | 295.99(1)                 | 19.99           | 205.40         | -29.25                                |
| <b>10</b>                        | C <sub>1</sub>  | <sup>2</sup> A                           | -2782.39162 | 213.34(0)                 | 15.96           | 168.97         | -25.88                                |
| <b><sup>3</sup>O<sub>2</sub></b> | D <sub>∞h</sub> | <sup>3</sup> Σ <sub>g</sub> <sup>-</sup> | -150.37835  | 2.37(0)                   | 2.08            | 49.01          | -2.40                                 |
| <b>11</b>                        | C <sub>1</sub>  | <sup>2</sup> A                           | -384.48870  | 89.67(0)                  | 5.23            | 86.27          | -8.69                                 |
| <b>11TS12</b>                    | C <sub>1</sub>  | <sup>2</sup> A                           | -384.42030  | 85.62(0)                  | 5.18            | 86.06          | -10.08                                |
| <b>12</b>                        | C <sub>1</sub>  | <sup>2</sup> A                           | -384.53981  | 87.62(0)                  | 5.93            | 92.50          | -13.55                                |
| <b>13</b>                        | C <sub>1</sub>  | <sup>1</sup> A                           | -308.76956  | 80.29(0)                  | 4.41            | 77.73          | -8.86                                 |
| <b>OH</b>                        | C <sub>∞v</sub> | <sup>2</sup> Π                           | -75.76403   | 5.21(0)                   | 2.07            | 42.61          | -3.79                                 |

<sup>a</sup>Point group. <sup>b</sup>Electronic state. <sup>c</sup>Zero-point energies and number of imaginary frequencies. <sup>d</sup>Thermal corrections to 298K. <sup>e</sup>Entropies (cal/mol·K). <sup>f</sup>Solvation free energies are computed as the difference between the B3LYP and SMD(acetonitrile)/B3LYP energies. <sup>g</sup>Result from the open shell singlet state (broken symmetry).

Geometry at B3LYP/6-31G(d) level of calculation 4 C<sub>1</sub>  
Standard orientation:

| Center<br>Number | Atomic<br>Number | Atomic<br>Type | Coordinates (Angstroms) |           |           |
|------------------|------------------|----------------|-------------------------|-----------|-----------|
|                  |                  |                | X                       | Y         | Z         |
| 1                | 29               | 0              | 1.308570                | 1.519379  | -0.242579 |
| 2                | 6                | 0              | -5.354226               | -1.797293 | 0.355398  |
| 3                | 6                | 0              | -3.217317               | -0.987638 | 0.070552  |
| 4                | 6                | 0              | -3.732774               | 0.272663  | -0.351161 |
| 5                | 6                | 0              | -5.848396               | -0.512639 | -0.080572 |
| 6                | 1                | 0              | -1.482529               | -2.157127 | 0.503960  |
| 7                | 6                | 0              | -1.823618               | -1.193322 | 0.142790  |
| 8                | 6                | 0              | -2.828965               | 1.303695  | -0.694985 |
| 9                | 6                | 0              | -1.473283               | 1.082683  | -0.620228 |
| 10               | 6                | 0              | -0.941937               | -0.181259 | -0.209336 |
| 11               | 1                | 0              | -3.226776               | 2.262624  | -1.013697 |
| 12               | 6                | 0              | 1.115021                | -1.379676 | -0.088039 |
| 13               | 6                | 0              | 2.522897                | -1.527647 | -0.030844 |
| 14               | 6                | 0              | 3.433515                | -0.409958 | -0.103528 |
| 15               | 6                | 0              | 3.038778                | -2.854108 | 0.077596  |
| 16               | 6                | 0              | 4.843475                | -0.695013 | -0.054887 |
| 17               | 6                | 0              | 4.386351                | -3.114052 | 0.127839  |
| 18               | 1                | 0              | 2.326785                | -3.676924 | 0.126124  |
| 19               | 6                | 0              | 5.270336                | -2.000245 | 0.059219  |
| 20               | 1                | 0              | 6.342514                | -2.190898 | 0.097404  |
| 21               | 1                | 0              | 0.540423                | -2.310369 | -0.088978 |
| 22               | 7                | 0              | 0.463622                | -0.240446 | -0.155666 |
| 23               | 8                | 0              | 3.070108                | 0.824307  | -0.228019 |
| 24               | 6                | 0              | 5.801227                | 0.463707  | -0.131291 |
| 25               | 1                | 0              | 5.615954                | 1.181372  | 0.676150  |
| 26               | 1                | 0              | 6.839131                | 0.121664  | -0.067803 |
| 27               | 1                | 0              | 5.672216                | 1.021051  | -1.066590 |
| 28               | 6                | 0              | 4.935411                | -4.514742 | 0.252202  |
| 29               | 1                | 0              | 5.527533                | -4.637149 | 1.168657  |
| 30               | 1                | 0              | 4.130560                | -5.256618 | 0.276457  |
| 31               | 1                | 0              | 5.594718                | -4.766557 | -0.588734 |
| 32               | 7                | 0              | -4.061886               | -2.009060 | 0.423541  |
| 33               | 7                | 0              | -5.080448               | 0.487082  | -0.420164 |
| 34               | 8                | 0              | -7.189932               | -0.360269 | -0.130516 |
| 35               | 1                | 0              | -7.351524               | 0.551428  | -0.436795 |
| 36               | 6                | 0              | -6.311376               | -2.891157 | 0.731621  |
| 37               | 1                | 0              | -5.749579               | -3.777001 | 1.033936  |
| 38               | 1                | 0              | -6.964466               | -2.574980 | 1.553730  |
| 39               | 1                | 0              | -6.967481               | -3.144538 | -0.109649 |
| 40               | 7                | 0              | -0.491826               | 2.093060  | -0.949991 |

|    |   |   |           |          |           |
|----|---|---|-----------|----------|-----------|
| 41 | 1 | 0 | -0.617578 | 2.995005 | -0.470924 |
| 42 | 1 | 0 | -0.458821 | 2.279546 | -1.953086 |
| 43 | 8 | 0 | 1.853022  | 3.237646 | 0.203639  |
| 44 | 8 | 0 | 0.710606  | 4.136844 | 0.367987  |
| 45 | 6 | 0 | 0.677157  | 4.478569 | 1.737636  |
| 46 | 1 | 0 | 0.494635  | 3.597621 | 2.371423  |
| 47 | 1 | 0 | 1.620877  | 4.946357 | 2.042216  |
| 48 | 1 | 0 | -0.145457 | 5.195407 | 1.852327  |

7 C<sub>2</sub>

Standard orientation:

| Center Number | Atomic Number | Atomic Type | Coordinates (Angstroms) |           |           |
|---------------|---------------|-------------|-------------------------|-----------|-----------|
|               |               |             | X                       | Y         | Z         |
| 1             | 6             | 0           | -0.005187               | 1.503056  | 0.047817  |
| 2             | 6             | 0           | -0.371449               | 0.671579  | -1.192338 |
| 3             | 6             | 0           | 0.371449                | -0.671579 | -1.192338 |
| 4             | 6             | 0           | 0.005187                | -1.503056 | 0.047817  |
| 5             | 6             | 0           | -0.005187               | -0.668485 | 1.306185  |
| 6             | 6             | 0           | 0.005187                | 0.668485  | 1.306185  |
| 7             | 1             | 0           | 0.983277                | 1.970244  | -0.089870 |
| 8             | 1             | 0           | -1.454055               | 0.482516  | -1.192849 |
| 9             | 1             | 0           | 0.149634                | -1.236805 | -2.105944 |
| 10            | 1             | 0           | 0.708859                | -2.339186 | 0.163919  |
| 11            | 1             | 0           | -0.019119               | -1.204621 | 2.254763  |
| 12            | 1             | 0           | 0.019119                | 1.204621  | 2.254763  |
| 13            | 1             | 0           | 1.454055                | -0.482516 | -1.192849 |
| 14            | 1             | 0           | -0.149634               | 1.236805  | -2.105944 |
| 15            | 1             | 0           | -0.708859               | 2.339186  | 0.163919  |
| 16            | 1             | 0           | -0.983277               | -1.970244 | -0.089870 |

4,7TS9,14 C<sub>1</sub>

Standard orientation:

| Center Number | Atomic Number | Atomic Type | Coordinates (Angstroms) |           |           |
|---------------|---------------|-------------|-------------------------|-----------|-----------|
|               |               |             | X                       | Y         | Z         |
| 1             | 29            | 0           | 0.911597                | -0.383565 | 0.188246  |
| 2             | 6             | 0           | -6.610100               | 0.080816  | -0.367472 |
| 3             | 6             | 0           | -4.318461               | 0.112883  | -0.146239 |
| 4             | 6             | 0           | -4.286133               | -1.310518 | -0.080067 |
| 5             | 6             | 0           | -6.549116               | -1.358596 | -0.290505 |
| 6             | 1             | 0           | -3.197158               | 1.924495  | -0.177954 |

|    |   |   |           |           |           |
|----|---|---|-----------|-----------|-----------|
| 7  | 6 | 0 | -3.117264 | 0.848167  | -0.076450 |
| 8  | 6 | 0 | -3.041289 | -1.960359 | 0.067383  |
| 9  | 6 | 0 | -1.878284 | -1.226374 | 0.150075  |
| 10 | 6 | 0 | -1.897247 | 0.203872  | 0.075732  |
| 11 | 1 | 0 | -3.022969 | -3.044886 | 0.122975  |
| 12 | 6 | 0 | -0.499076 | 2.126003  | 0.174992  |
| 13 | 6 | 0 | 0.711566  | 2.858323  | 0.053156  |
| 14 | 6 | 0 | 1.974715  | 2.237925  | -0.254636 |
| 15 | 6 | 0 | 0.632804  | 4.275056  | 0.187944  |
| 16 | 6 | 0 | 3.107378  | 3.101344  | -0.448321 |
| 17 | 6 | 0 | 1.727075  | 5.090945  | 0.022152  |
| 18 | 1 | 0 | -0.335615 | 4.712957  | 0.425976  |
| 19 | 6 | 0 | 2.960910  | 4.465398  | -0.303203 |
| 20 | 1 | 0 | 3.838167  | 5.096587  | -0.443320 |
| 21 | 1 | 0 | -1.395085 | 2.731704  | 0.332433  |
| 22 | 7 | 0 | -0.630138 | 0.822820  | 0.098082  |
| 23 | 8 | 0 | 2.146093  | 0.959770  | -0.380527 |
| 24 | 6 | 0 | 4.431690  | 2.471263  | -0.787915 |
| 25 | 1 | 0 | 5.211543  | 3.230293  | -0.906408 |
| 26 | 1 | 0 | 4.743681  | 1.769104  | -0.005195 |
| 27 | 1 | 0 | 4.367142  | 1.891731  | -1.717172 |
| 28 | 6 | 0 | 1.646822  | 6.591320  | 0.170584  |
| 29 | 1 | 0 | 0.627226  | 6.913020  | 0.406660  |
| 30 | 1 | 0 | 2.302635  | 6.954361  | 0.972885  |
| 31 | 1 | 0 | 1.953197  | 7.106796  | -0.749104 |
| 32 | 7 | 0 | -5.504763 | 0.783610  | -0.296311 |
| 33 | 7 | 0 | -5.441522 | -2.036790 | -0.156132 |
| 34 | 8 | 0 | -7.723321 | -2.025153 | -0.366923 |
| 35 | 1 | 0 | -7.502841 | -2.972667 | -0.298862 |
| 36 | 6 | 0 | -7.930288 | 0.778286  | -0.529954 |
| 37 | 1 | 0 | -7.767980 | 1.857206  | -0.569588 |
| 38 | 1 | 0 | -8.436609 | 0.451956  | -1.446248 |
| 39 | 1 | 0 | -8.604519 | 0.541602  | 0.301829  |
| 40 | 7 | 0 | -0.583655 | -1.828566 | 0.274005  |
| 41 | 1 | 0 | -0.495401 | -2.686674 | -0.265086 |
| 42 | 1 | 0 | -0.293915 | -2.029537 | 1.250091  |
| 43 | 8 | 0 | 2.199750  | -1.687562 | 0.618585  |
| 44 | 8 | 0 | 1.032867  | -1.295697 | 2.229161  |
| 45 | 6 | 0 | 1.933297  | -1.382482 | 3.280013  |
| 46 | 1 | 0 | 2.357646  | -2.395067 | 3.389902  |
| 47 | 1 | 0 | 2.769991  | -0.673002 | 3.180582  |
| 48 | 1 | 0 | 1.406624  | -1.141162 | 4.222707  |
| 49 | 6 | 0 | 5.722487  | -4.010833 | -0.364336 |
| 50 | 6 | 0 | 4.212430  | -4.302391 | -0.364364 |
| 51 | 6 | 0 | 3.481951  | -3.456051 | -1.416465 |
| 52 | 6 | 0 | 3.733341  | -1.982758 | -1.177726 |

|    |   |   |          |           |           |
|----|---|---|----------|-----------|-----------|
| 53 | 6 | 0 | 5.105478 | -1.619264 | -0.833425 |
| 54 | 6 | 0 | 6.022564 | -2.539627 | -0.463685 |
| 55 | 1 | 0 | 6.191025 | -4.422597 | 0.540263  |
| 56 | 1 | 0 | 4.034417 | -5.370401 | -0.536042 |
| 57 | 1 | 0 | 3.848860 | -3.713521 | -2.424299 |
| 58 | 1 | 0 | 3.225246 | -1.291498 | -1.850091 |
| 59 | 1 | 0 | 5.373062 | -0.566072 | -0.865871 |
| 60 | 1 | 0 | 7.040331 | -2.220087 | -0.244576 |
| 61 | 1 | 0 | 3.125696 | -1.635757 | -0.017496 |
| 62 | 1 | 0 | 2.408055 | -3.663765 | -1.403710 |
| 63 | 1 | 0 | 3.792103 | -4.054676 | 0.617503  |
| 64 | 1 | 0 | 6.213074 | -4.529514 | -1.205386 |

---

### 9 C<sub>s</sub>

Standard orientation:

| Center<br>Number | Atomic<br>Number | Atomic<br>Type | Coordinates (Angstroms) |           |           |
|------------------|------------------|----------------|-------------------------|-----------|-----------|
|                  |                  |                | X                       | Y         | Z         |
| 1                | 6                | 0              | -0.108186               | -0.694320 | 1.274119  |
| 2                | 6                | 0              | 0.502718                | -1.305691 | 0.000000  |
| 3                | 6                | 0              | -0.108186               | -0.694320 | -1.274119 |
| 4                | 6                | 0              | -0.108186               | 0.809006  | -1.218098 |
| 5                | 6                | 0              | -0.098409               | 1.478107  | 0.000000  |
| 6                | 6                | 0              | -0.108186               | 0.809006  | 1.218098  |
| 7                | 1                | 0              | -1.141713               | -1.062139 | 1.400211  |
| 8                | 1                | 0              | 1.582547                | -1.108573 | 0.000000  |
| 9                | 1                | 0              | 0.437306                | -1.045154 | -2.160460 |
| 10               | 1                | 0              | -0.098916               | 2.567160  | 0.000000  |
| 11               | 1                | 0              | -0.139485               | 1.370009  | 2.148664  |
| 12               | 1                | 0              | -1.141713               | -1.062139 | -1.400211 |
| 13               | 1                | 0              | 0.374759                | -2.394745 | 0.000000  |
| 14               | 1                | 0              | 0.437306                | -1.045154 | 2.160460  |
| 15               | 1                | 0              | -0.139485               | 1.370009  | -2.148664 |

---

### 14 C<sub>1</sub>

Standard orientation:

| Center<br>Number | Atomic<br>Number | Atomic<br>Type | Coordinates (Angstroms) |           |           |
|------------------|------------------|----------------|-------------------------|-----------|-----------|
|                  |                  |                | X                       | Y         | Z         |
| 1                | 29               | 0              | 1.372345                | -1.621649 | -0.381425 |
| 2                | 6                | 0              | -5.271570               | 1.446290  | -0.742210 |
| 3                | 6                | 0              | -3.149919               | 0.751758  | -0.190531 |

|    |   |   |           |           |           |
|----|---|---|-----------|-----------|-----------|
| 4  | 6 | 0 | -3.659655 | -0.076295 | 0.853994  |
| 5  | 6 | 0 | -5.764490 | 0.606332  | 0.318451  |
| 6  | 1 | 0 | -1.377463 | 1.377501  | -1.242777 |
| 7  | 6 | 0 | -1.756040 | 0.780700  | -0.419229 |
| 8  | 6 | 0 | -2.772868 | -0.831761 | 1.646026  |
| 9  | 6 | 0 | -1.405220 | -0.795160 | 1.416619  |
| 10 | 6 | 0 | -0.900903 | 0.034709  | 0.361095  |
| 11 | 1 | 0 | -3.186274 | -1.443320 | 2.442937  |
| 12 | 6 | 0 | 1.158114  | 1.161640  | 0.177340  |
| 13 | 6 | 0 | 2.574355  | 1.311234  | 0.068040  |
| 14 | 6 | 0 | 3.432161  | 0.177947  | 0.177066  |
| 15 | 6 | 0 | 3.122202  | 2.615578  | -0.022944 |
| 16 | 6 | 0 | 4.840653  | 0.396345  | 0.212172  |
| 17 | 6 | 0 | 4.485953  | 2.828528  | -0.024022 |
| 18 | 1 | 0 | 2.439760  | 3.460240  | -0.098217 |
| 19 | 6 | 0 | 5.320333  | 1.691678  | 0.099995  |
| 20 | 1 | 0 | 6.399300  | 1.840642  | 0.109840  |
| 21 | 1 | 0 | 0.577418  | 2.071941  | 0.344968  |
| 22 | 7 | 0 | 0.505571  | 0.032886  | 0.145032  |
| 23 | 8 | 0 | 2.987128  | -1.051670 | 0.320227  |
| 24 | 6 | 0 | 5.759240  | -0.788180 | 0.357552  |
| 25 | 1 | 0 | 5.613314  | -1.505151 | -0.459301 |
| 26 | 1 | 0 | 6.807529  | -0.474640 | 0.357108  |
| 27 | 1 | 0 | 5.561566  | -1.332867 | 1.288440  |
| 28 | 6 | 0 | 5.083969  | 4.209598  | -0.148302 |
| 29 | 1 | 0 | 5.675728  | 4.311545  | -1.067091 |
| 30 | 1 | 0 | 4.305709  | 4.979059  | -0.169885 |
| 31 | 1 | 0 | 5.753634  | 4.435948  | 0.690861  |
| 32 | 7 | 0 | -3.979387 | 1.502522  | -0.973372 |
| 33 | 7 | 0 | -5.006439 | -0.125433 | 1.091380  |
| 34 | 8 | 0 | -7.103348 | 0.588063  | 0.513526  |
| 35 | 1 | 0 | -7.257786 | -0.026345 | 1.254994  |
| 36 | 6 | 0 | -6.218979 | 2.255411  | -1.581869 |
| 37 | 1 | 0 | -5.651281 | 2.822687  | -2.322433 |
| 38 | 1 | 0 | -6.940727 | 1.609547  | -2.096350 |
| 39 | 1 | 0 | -6.803022 | 2.948028  | -0.963781 |
| 40 | 7 | 0 | -0.513362 | -1.555539 | 2.157297  |
| 41 | 1 | 0 | -0.880920 | -1.966939 | 3.004914  |
| 42 | 1 | 0 | 0.419712  | -1.181270 | 2.269591  |
| 43 | 8 | 0 | 2.151341  | -3.152432 | -0.837448 |
| 44 | 8 | 0 | -0.166717 | -2.110415 | -1.128071 |
| 45 | 6 | 0 | -0.367613 | -3.406616 | -1.619243 |
| 46 | 1 | 0 | 0.347558  | -3.684821 | -2.403093 |
| 47 | 1 | 0 | -0.336790 | -4.170879 | -0.830352 |
| 48 | 1 | 0 | -1.379111 | -3.401017 | -2.056160 |
| 49 | 1 | 0 | 3.063876  | -3.029892 | -0.521134 |



-----  
**9,14TS15 C<sub>1</sub>**

Standard orientation:

| Center<br>Number | Atomic<br>Number | Atomic<br>Type | Coordinates (Angstroms) |           |           |
|------------------|------------------|----------------|-------------------------|-----------|-----------|
|                  |                  |                | X                       | Y         | Z         |
| 1                | 29               | 0              | 1.225231                | -0.060533 | -0.151628 |
| 2                | 6                | 0              | -6.054488               | -0.239692 | -1.001256 |
| 3                | 6                | 0              | -3.891905               | 0.089474  | -0.290856 |
| 4                | 6                | 0              | -4.088894               | -0.792708 | 0.813585  |
| 5                | 6                | 0              | -6.232310               | -1.122942 | 0.119777  |
| 6                | 1                | 0              | -2.473578               | 1.341724  | -1.319087 |
| 7                | 6                | 0              | -2.627873               | 0.699649  | -0.457803 |
| 8                | 6                | 0              | -3.033720               | -1.030179 | 1.715169  |
| 9                | 6                | 0              | -1.794788               | -0.429043 | 1.540583  |
| 10               | 6                | 0              | -1.600733               | 0.457507  | 0.427829  |
| 11               | 1                | 0              | -3.212231               | -1.697256 | 2.553871  |
| 12               | 6                | 0              | -0.280856               | 2.375471  | 0.232346  |
| 13               | 6                | 0              | 0.874590                | 3.195140  | 0.070889  |
| 14               | 6                | 0              | 2.186961                | 2.642047  | -0.030114 |
| 15               | 6                | 0              | 0.695519                | 4.604805  | 0.070483  |
| 16               | 6                | 0              | 3.294589                | 3.544692  | -0.111189 |
| 17               | 6                | 0              | 1.759931                | 5.474802  | -0.025850 |
| 18               | 1                | 0              | -0.318063               | 4.994568  | 0.148941  |
| 19               | 6                | 0              | 3.056058                | 4.906824  | -0.113759 |
| 20               | 1                | 0              | 3.911051                | 5.578166  | -0.187421 |
| 21               | 1                | 0              | -1.227148               | 2.906750  | 0.366950  |
| 22               | 7                | 0              | -0.323428               | 1.068814  | 0.270032  |
| 23               | 8                | 0              | 2.435095                | 1.360855  | -0.044475 |
| 24               | 6                | 0              | 4.684765                | 2.973829  | -0.206167 |
| 25               | 1                | 0              | 4.791501                | 2.336169  | -1.092086 |
| 26               | 1                | 0              | 5.434243                | 3.769517  | -0.260520 |
| 27               | 1                | 0              | 4.913718                | 2.341541  | 0.660418  |
| 28               | 6                | 0              | 1.577611                | 6.973866  | -0.036453 |
| 29               | 1                | 0              | 1.951966                | 7.420100  | -0.966912 |
| 30               | 1                | 0              | 0.521481                | 7.245999  | 0.058700  |
| 31               | 1                | 0              | 2.119934                | 7.453454  | 0.788627  |
| 32               | 7                | 0              | -4.892122               | 0.347643  | -1.182464 |
| 33               | 7                | 0              | -5.303304               | -1.396225 | 0.997704  |
| 34               | 8                | 0              | -7.449888               | -1.699778 | 0.261591  |
| 35               | 1                | 0              | -7.387425               | -2.258324 | 1.058486  |
| 36               | 6                | 0              | -7.180763               | 0.017822  | -1.962322 |
| 37               | 1                | 0              | -6.844079               | 0.712930  | -2.734453 |

|    |   |   |           |           |           |
|----|---|---|-----------|-----------|-----------|
| 38 | 1 | 0 | -7.517751 | -0.912379 | -2.435748 |
| 39 | 1 | 0 | -8.052136 | 0.441632  | -1.448346 |
| 40 | 7 | 0 | -0.743303 | -0.670270 | 2.406101  |
| 41 | 1 | 0 | -0.981343 | -1.065669 | 3.305079  |
| 42 | 1 | 0 | -0.015882 | 0.029528  | 2.445855  |
| 43 | 8 | 0 | 2.652597  | -1.191599 | -0.025968 |
| 44 | 8 | 0 | 0.108261  | -1.324399 | -0.765621 |
| 45 | 6 | 0 | 0.485461  | -2.654897 | -0.932094 |
| 46 | 1 | 0 | 1.197459  | -2.802917 | -1.760448 |
| 47 | 1 | 0 | 0.926418  | -3.095196 | -0.024626 |
| 48 | 1 | 0 | -0.431093 | -3.222583 | -1.164924 |
| 49 | 1 | 0 | 3.392039  | -0.558927 | 0.004652  |
| 50 | 6 | 0 | 3.362635  | -5.446702 | -0.681419 |
| 51 | 6 | 0 | 4.659905  | -4.819434 | -1.220204 |
| 52 | 6 | 0 | 4.710143  | -3.306386 | -0.943253 |
| 53 | 6 | 0 | 4.384876  | -2.991716 | 0.487589  |
| 54 | 6 | 0 | 3.628614  | -3.876299 | 1.265384  |
| 55 | 6 | 0 | 3.100430  | -5.034753 | 0.739147  |
| 56 | 1 | 0 | 2.510846  | -5.135190 | -1.309073 |
| 57 | 1 | 0 | 5.514902  | -5.302782 | -0.729255 |
| 58 | 1 | 0 | 5.693974  | -2.899902 | -1.211557 |
| 59 | 1 | 0 | 3.422043  | -3.617244 | 2.301162  |
| 60 | 1 | 0 | 2.471564  | -5.671538 | 1.357065  |
| 61 | 1 | 0 | 3.976995  | -2.782500 | -1.573763 |
| 62 | 1 | 0 | 4.757309  | -5.010324 | -2.295097 |
| 63 | 1 | 0 | 3.403801  | -6.541161 | -0.758616 |
| 64 | 1 | 0 | 4.829809  | -2.120164 | 0.955265  |

-----

**15 C<sub>1</sub>**

Standard orientation:

| Center<br>Number | Atomic<br>Number | Atomic<br>Type | Coordinates (Angstroms) |           |           |
|------------------|------------------|----------------|-------------------------|-----------|-----------|
|                  |                  |                | X                       | Y         | Z         |
| 1                | 29               | 0              | 1.196157                | 0.303290  | 0.695463  |
| 2                | 6                | 0              | -5.972414               | -1.024257 | 0.544217  |
| 3                | 6                | 0              | -3.732954               | -0.814990 | 0.062076  |
| 4                | 6                | 0              | -3.991009               | 0.306849  | -0.780551 |
| 5                | 6                | 0              | -6.209717               | 0.106452  | -0.312791 |
| 6                | 1                | 0              | -2.206717               | -2.072384 | 0.914965  |
| 7                | 6                | 0              | -2.399412               | -1.252260 | 0.231042  |
| 8                | 6                | 0              | -2.922030               | 0.941025  | -1.445994 |
| 9                | 6                | 0              | -1.619968               | 0.501632  | -1.274075 |
| 10               | 6                | 0              | -1.361166               | -0.613812 | -0.411728 |
| 11               | 1                | 0              | -3.146576               | 1.777741  | -2.101765 |

|    |   |   |           |           |           |
|----|---|---|-----------|-----------|-----------|
| 12 | 6 | 0 | 0.344811  | -2.221764 | -0.426019 |
| 13 | 6 | 0 | 1.654664  | -2.784548 | -0.283208 |
| 14 | 6 | 0 | 2.803541  | -2.003655 | 0.061288  |
| 15 | 6 | 0 | 1.799657  | -4.171521 | -0.548931 |
| 16 | 6 | 0 | 4.071940  | -2.659765 | 0.110492  |
| 17 | 6 | 0 | 3.022408  | -4.807922 | -0.487243 |
| 18 | 1 | 0 | 0.908204  | -4.740410 | -0.808637 |
| 19 | 6 | 0 | 4.147692  | -4.016408 | -0.153963 |
| 20 | 1 | 0 | 5.123725  | -4.498028 | -0.102709 |
| 21 | 1 | 0 | -0.432623 | -2.911540 | -0.771323 |
| 22 | 7 | 0 | -0.004303 | -0.981661 | -0.216961 |
| 23 | 8 | 0 | 2.747751  | -0.720368 | 0.311432  |
| 24 | 6 | 0 | 5.290291  | -1.846576 | 0.461570  |
| 25 | 1 | 0 | 5.176639  | -1.362998 | 1.439332  |
| 26 | 1 | 0 | 6.187947  | -2.472169 | 0.487698  |
| 27 | 1 | 0 | 5.455957  | -1.041624 | -0.266064 |
| 28 | 6 | 0 | 3.175296  | -6.285426 | -0.760877 |
| 29 | 1 | 0 | 3.565820  | -6.820903 | 0.114246  |
| 30 | 1 | 0 | 2.215712  | -6.741444 | -1.025223 |
| 31 | 1 | 0 | 3.871754  | -6.474503 | -1.588002 |
| 32 | 7 | 0 | -4.744370 | -1.461289 | 0.712956  |
| 33 | 7 | 0 | -5.272589 | 0.752122  | -0.955457 |
| 34 | 8 | 0 | -7.494070 | 0.513561  | -0.452895 |
| 35 | 1 | 0 | -7.465693 | 1.280819  | -1.054034 |
| 36 | 6 | 0 | -7.112181 | -1.708107 | 1.245323  |
| 37 | 1 | 0 | -6.725073 | -2.542932 | 1.833399  |
| 38 | 1 | 0 | -7.641534 | -1.013621 | 1.908990  |
| 39 | 1 | 0 | -7.852391 | -2.081921 | 0.527555  |
| 40 | 7 | 0 | -0.538040 | 1.120578  | -1.904592 |
| 41 | 1 | 0 | -0.799691 | 1.755906  | -2.648893 |
| 42 | 1 | 0 | 0.195969  | 0.485232  | -2.193620 |
| 43 | 8 | 0 | 2.605009  | 1.825004  | 0.595148  |
| 44 | 8 | 0 | -0.122073 | 1.134400  | 1.641680  |
| 45 | 6 | 0 | 0.256041  | 1.743621  | 2.842854  |
| 46 | 1 | 0 | 0.759561  | 1.054551  | 3.548770  |
| 47 | 1 | 0 | 0.927259  | 2.610586  | 2.701371  |
| 48 | 1 | 0 | -0.642548 | 2.117662  | 3.361477  |
| 49 | 1 | 0 | 3.352688  | 1.261581  | 0.317786  |
| 50 | 6 | 0 | 2.287459  | 5.917242  | -0.422316 |
| 51 | 6 | 0 | 3.438105  | 5.126697  | -1.068308 |
| 52 | 6 | 0 | 3.702711  | 3.819789  | -0.307154 |
| 53 | 6 | 0 | 2.457585  | 2.934769  | -0.336489 |
| 54 | 6 | 0 | 1.216003  | 3.689953  | 0.050069  |
| 55 | 6 | 0 | 1.147994  | 5.023910  | 0.003869  |
| 56 | 1 | 0 | 2.657079  | 6.467951  | 0.457139  |
| 57 | 1 | 0 | 3.178668  | 4.891507  | -2.110038 |

|    |   |   |          |          |           |
|----|---|---|----------|----------|-----------|
| 58 | 1 | 0 | 4.561640 | 3.285765 | -0.735474 |
| 59 | 1 | 0 | 0.374581 | 3.078447 | 0.369861  |
| 60 | 1 | 0 | 0.222283 | 5.515503 | 0.300170  |
| 61 | 1 | 0 | 3.940329 | 4.035841 | 0.742148  |
| 62 | 1 | 0 | 4.348785 | 5.735677 | -1.103322 |
| 63 | 1 | 0 | 1.921644 | 6.687232 | -1.115521 |
| 64 | 1 | 0 | 2.328152 | 2.502481 | -1.342152 |

-----

**16 C<sub>1</sub>**

Standard orientation:

| Center<br>Number | Atomic<br>Number | Atomic<br>Type | Coordinates (Angstroms) |           |           |
|------------------|------------------|----------------|-------------------------|-----------|-----------|
|                  |                  |                | X                       | Y         | Z         |
| 1                | 29               | 0              | -1.459952               | -0.216569 | 0.410934  |
| 2                | 6                | 0              | 6.188136                | 0.173955  | 0.553340  |
| 3                | 6                | 0              | 3.918545                | 0.053840  | 0.208401  |
| 4                | 6                | 0              | 4.066090                | -1.145118 | -0.547343 |
| 5                | 6                | 0              | 6.315134                | -1.034231 | -0.219658 |
| 6                | 1                | 0              | 2.530648                | 1.500951  | 0.963668  |
| 7                | 6                | 0              | 2.623949                | 0.587915  | 0.384447  |
| 8                | 6                | 0              | 2.919113                | -1.792490 | -1.040715 |
| 9                | 6                | 0              | 1.639567                | -1.285208 | -0.837208 |
| 10               | 6                | 0              | 1.502984                | -0.018790 | -0.158521 |
| 11               | 1                | 0              | 3.050532                | -2.732004 | -1.570708 |
| 12               | 6                | 0              | 0.241712                | 1.918255  | -0.348137 |
| 13               | 6                | 0              | -0.819142               | 2.873363  | -0.247355 |
| 14               | 6                | 0              | -2.148181               | 2.548166  | 0.163441  |
| 15               | 6                | 0              | -0.499628               | 4.218760  | -0.578244 |
| 16               | 6                | 0              | -3.110341               | 3.600409  | 0.250115  |
| 17               | 6                | 0              | -1.427592               | 5.235826  | -0.500387 |
| 18               | 1                | 0              | 0.517836                | 4.441876  | -0.894703 |
| 19               | 6                | 0              | -2.734040               | 4.891256  | -0.076092 |
| 20               | 1                | 0              | -3.481528               | 5.680658  | -0.004159 |
| 21               | 1                | 0              | 1.188016                | 2.333818  | -0.702682 |
| 22               | 7                | 0              | 0.233904                | 0.634887  | -0.074362 |
| 23               | 8                | 0              | -2.521386               | 1.328825  | 0.452887  |
| 24               | 6                | 0              | -4.509962               | 3.263003  | 0.692435  |
| 25               | 1                | 0              | -4.508461               | 2.763952  | 1.668640  |
| 26               | 1                | 0              | -5.128714               | 4.162926  | 0.763254  |
| 27               | 1                | 0              | -4.995317               | 2.571621  | -0.008925 |
| 28               | 6                | 0              | -1.084716               | 6.665383  | -0.846824 |
| 29               | 1                | 0              | -1.240446               | 7.337308  | 0.007070  |
| 30               | 1                | 0              | -0.038436               | 6.758984  | -1.154965 |
| 31               | 1                | 0              | -1.707310               | 7.042759  | -1.668348 |

|    |   |   |           |           |           |
|----|---|---|-----------|-----------|-----------|
| 32 | 7 | 0 | 4.996620  | 0.692084  | 0.752133  |
| 33 | 7 | 0 | 5.310281  | -1.678128 | -0.751841 |
| 34 | 8 | 0 | 7.566462  | -1.520054 | -0.396720 |
| 35 | 1 | 0 | 7.465103  | -2.327247 | -0.934528 |
| 36 | 6 | 0 | 7.401991  | 0.844781  | 1.131620  |
| 37 | 1 | 0 | 7.094086  | 1.737046  | 1.680876  |
| 38 | 1 | 0 | 7.941784  | 0.171349  | 1.808365  |
| 39 | 1 | 0 | 8.109623  | 1.130649  | 0.343862  |
| 40 | 7 | 0 | 0.513755  | -1.943360 | -1.319001 |
| 41 | 1 | 0 | 0.747980  | -2.834206 | -1.745402 |
| 42 | 1 | 0 | -0.199358 | -2.076716 | -0.585431 |
| 43 | 8 | 0 | -3.175197 | -0.903722 | -0.643289 |
| 44 | 8 | 0 | -1.045757 | -1.887085 | 1.039254  |
| 45 | 6 | 0 | -0.177822 | -2.062734 | 2.128506  |
| 46 | 1 | 0 | 0.771528  | -1.511822 | 2.017651  |
| 47 | 1 | 0 | -0.631460 | -1.742449 | 3.082560  |
| 48 | 1 | 0 | 0.081395  | -3.128395 | 2.234707  |
| 49 | 1 | 0 | -3.737897 | -0.131864 | -0.454787 |
| 50 | 6 | 0 | -3.861335 | -5.015603 | 0.072653  |
| 51 | 6 | 0 | -4.886848 | -4.036024 | 0.666869  |
| 52 | 6 | 0 | -4.313772 | -2.613079 | 0.727535  |
| 53 | 6 | 0 | -3.967931 | -2.120487 | -0.679260 |
| 54 | 6 | 0 | -3.196955 | -3.146259 | -1.464433 |
| 55 | 6 | 0 | -3.156851 | -4.439391 | -1.130379 |
| 56 | 1 | 0 | -3.107692 | -5.276268 | 0.831833  |
| 57 | 1 | 0 | -5.795189 | -4.042441 | 0.047473  |
| 58 | 1 | 0 | -5.025283 | -1.924838 | 1.202626  |
| 59 | 1 | 0 | -2.674835 | -2.775889 | -2.344384 |
| 60 | 1 | 0 | -2.581775 | -5.130325 | -1.745847 |
| 61 | 1 | 0 | -3.386871 | -2.600577 | 1.311522  |
| 62 | 1 | 0 | -5.189410 | -4.364606 | 1.667981  |
| 63 | 1 | 0 | -4.349434 | -5.961781 | -0.198443 |
| 64 | 1 | 0 | -4.888025 | -1.867046 | -1.230230 |

-----

**16TS17 C<sub>1</sub>**

Standard orientation:

| Center<br>Number | Atomic<br>Number | Atomic<br>Type | Coordinates (Angstroms) |           |           |
|------------------|------------------|----------------|-------------------------|-----------|-----------|
|                  |                  |                | X                       | Y         | Z         |
| 1                | 29               | 0              | -1.259523               | -0.289071 | 0.505518  |
| 2                | 6                | 0              | 6.257391                | 0.641997  | 0.103382  |
| 3                | 6                | 0              | 3.964213                | 0.453155  | 0.101669  |
| 4                | 6                | 0              | 4.054528                | -0.922591 | -0.257659 |
| 5                | 6                | 0              | 6.321866                | -0.750004 | -0.268527 |

|    |   |   |           |           |           |
|----|---|---|-----------|-----------|-----------|
| 6  | 1 | 0 | 2.669652  | 2.091665  | 0.550791  |
| 7  | 6 | 0 | 2.694955  | 1.044357  | 0.270342  |
| 8  | 6 | 0 | 2.869535  | -1.679065 | -0.375602 |
| 9  | 6 | 0 | 1.629234  | -1.100694 | -0.180288 |
| 10 | 6 | 0 | 1.534254  | 0.309340  | 0.079249  |
| 11 | 1 | 0 | 2.953061  | -2.740026 | -0.592807 |
| 12 | 6 | 0 | 0.073630  | 2.142561  | -0.188067 |
| 13 | 6 | 0 | -1.144561 | 2.885696  | -0.192770 |
| 14 | 6 | 0 | -2.427582 | 2.300146  | 0.063306  |
| 15 | 6 | 0 | -1.053145 | 4.273465  | -0.493247 |
| 16 | 6 | 0 | -3.577040 | 3.152438  | 0.020357  |
| 17 | 6 | 0 | -2.159963 | 5.092815  | -0.530204 |
| 18 | 1 | 0 | -0.067134 | 4.691001  | -0.690895 |
| 19 | 6 | 0 | -3.418054 | 4.495616  | -0.264758 |
| 20 | 1 | 0 | -4.306266 | 5.126252  | -0.288412 |
| 21 | 1 | 0 | 0.959046  | 2.710089  | -0.484218 |
| 22 | 7 | 0 | 0.234889  | 0.878525  | 0.111413  |
| 23 | 8 | 0 | -2.603519 | 1.033640  | 0.316616  |
| 24 | 6 | 0 | -4.929379 | 2.547142  | 0.290149  |
| 25 | 1 | 0 | -4.950689 | 2.042094  | 1.262930  |
| 26 | 1 | 0 | -5.712829 | 3.311225  | 0.276323  |
| 27 | 1 | 0 | -5.183157 | 1.785990  | -0.459168 |
| 28 | 6 | 0 | -2.060859 | 6.568118  | -0.837047 |
| 29 | 1 | 0 | -2.655308 | 6.838752  | -1.719298 |
| 30 | 1 | 0 | -2.429170 | 7.180560  | -0.003724 |
| 31 | 1 | 0 | -1.025126 | 6.864374  | -1.032268 |
| 32 | 7 | 0 | 5.089332  | 1.213304  | 0.280891  |
| 33 | 7 | 0 | 5.275040  | -1.510947 | -0.442901 |
| 34 | 8 | 0 | 7.554153  | -1.279916 | -0.442031 |
| 35 | 1 | 0 | 7.414991  | -2.214099 | -0.685002 |
| 36 | 6 | 0 | 7.516173  | 1.440350  | 0.288419  |
| 37 | 1 | 0 | 7.258162  | 2.463556  | 0.568816  |
| 38 | 1 | 0 | 8.151065  | 0.999217  | 1.066140  |
| 39 | 1 | 0 | 8.112300  | 1.454604  | -0.631929 |
| 40 | 7 | 0 | 0.417430  | -1.835202 | -0.258118 |
| 41 | 1 | 0 | 0.473312  | -2.627370 | -0.892697 |
| 42 | 1 | 0 | 0.079911  | -2.161848 | 0.663411  |
| 43 | 8 | 0 | -2.727628 | -1.232716 | -0.995067 |
| 44 | 8 | 0 | -1.254009 | -1.624654 | 1.833540  |
| 45 | 6 | 0 | -1.279698 | -1.405345 | 3.213563  |
| 46 | 1 | 0 | -2.204873 | -0.897337 | 3.540012  |
| 47 | 1 | 0 | -1.226030 | -2.358957 | 3.766697  |
| 48 | 1 | 0 | -0.435707 | -0.783275 | 3.566734  |
| 49 | 1 | 0 | -3.399798 | -0.566557 | -0.765870 |
| 50 | 6 | 0 | -2.905051 | -5.385425 | -0.301572 |
| 51 | 6 | 0 | -4.152513 | -4.580196 | 0.098078  |

|    |   |   |           |           |           |
|----|---|---|-----------|-----------|-----------|
| 52 | 6 | 0 | -3.827242 | -3.084463 | 0.213853  |
| 53 | 6 | 0 | -3.338972 | -2.533600 | -1.130577 |
| 54 | 6 | 0 | -2.320187 | -3.438423 | -1.773082 |
| 55 | 6 | 0 | -2.126917 | -4.708965 | -1.403750 |
| 56 | 1 | 0 | -2.248003 | -5.519465 | 0.571846  |
| 57 | 1 | 0 | -4.935682 | -4.731674 | -0.658690 |
| 58 | 1 | 0 | -4.709594 | -2.521548 | 0.546903  |
| 59 | 1 | 0 | -1.747502 | -2.997910 | -2.587372 |
| 60 | 1 | 0 | -1.375910 | -5.306761 | -1.920182 |
| 61 | 1 | 0 | -3.033424 | -2.914473 | 0.951540  |
| 62 | 1 | 0 | -4.556734 | -4.954511 | 1.045864  |
| 63 | 1 | 0 | -3.188098 | -6.399099 | -0.617083 |
| 64 | 1 | 0 | -4.190816 | -2.422544 | -1.823162 |

17 C<sub>1</sub>

Standard orientation:

| Center<br>Number | Atomic<br>Number | Atomic<br>Type | Coordinates (Angstroms) |           |           |
|------------------|------------------|----------------|-------------------------|-----------|-----------|
|                  |                  |                | X                       | Y         | Z         |
| 1                | 29               | 0              | -0.952784               | -0.275556 | 1.000622  |
| 2                | 6                | 0              | 6.314003                | 0.869727  | -0.181655 |
| 3                | 6                | 0              | 4.023452                | 0.673185  | -0.056668 |
| 4                | 6                | 0              | 4.133554                | -0.739824 | 0.096157  |
| 5                | 6                | 0              | 6.396577                | -0.562877 | -0.032433 |
| 6                | 1                | 0              | 2.717651                | 2.366798  | -0.115900 |
| 7                | 6                | 0              | 2.751066                | 1.284731  | -0.049268 |
| 8                | 6                | 0              | 2.958266                | -1.513030 | 0.236135  |
| 9                | 6                | 0              | 1.726060                | -0.900561 | 0.231261  |
| 10               | 6                | 0              | 1.604764                | 0.519122  | 0.087019  |
| 11               | 1                | 0              | 3.051899                | -2.589626 | 0.342597  |
| 12               | 6                | 0              | -0.056575               | 2.182951  | -0.279037 |
| 13               | 6                | 0              | -1.368028               | 2.741517  | -0.254571 |
| 14               | 6                | 0              | -2.531995               | 1.999012  | 0.148068  |
| 15               | 6                | 0              | -1.508119               | 4.086708  | -0.698512 |
| 16               | 6                | 0              | -3.799808               | 2.665561  | 0.092280  |
| 17               | 6                | 0              | -2.727693               | 4.724248  | -0.739449 |
| 18               | 1                | 0              | -0.610069               | 4.620621  | -1.005887 |
| 19               | 6                | 0              | -3.864120               | 3.978557  | -0.333204 |
| 20               | 1                | 0              | -4.838747               | 4.465002  | -0.360214 |
| 21               | 1                | 0              | 0.714349                | 2.808997  | -0.737928 |
| 22               | 7                | 0              | 0.283753                | 1.006211  | 0.179024  |
| 23               | 8                | 0              | -2.509528               | 0.751203  | 0.529183  |
| 24               | 6                | 0              | -5.027358               | 1.897670  | 0.506149  |
| 25               | 1                | 0              | -5.185848               | 1.024081  | -0.138485 |

|    |   |   |           |           |           |
|----|---|---|-----------|-----------|-----------|
| 26 | 1 | 0 | -4.924726 | 1.509180  | 1.525722  |
| 27 | 1 | 0 | -5.921231 | 2.527535  | 0.457677  |
| 28 | 6 | 0 | -2.874432 | 6.156364  | -1.194905 |
| 29 | 1 | 0 | -3.289698 | 6.792205  | -0.402161 |
| 30 | 1 | 0 | -1.908878 | 6.581301  | -1.487852 |
| 31 | 1 | 0 | -3.549152 | 6.239569  | -2.056807 |
| 32 | 7 | 0 | 5.140311  | 1.455911  | -0.189888 |
| 33 | 7 | 0 | 5.358888  | -1.344137 | 0.103194  |
| 34 | 8 | 0 | 7.633559  | -1.107180 | -0.034730 |
| 35 | 1 | 0 | 7.509441  | -2.068018 | 0.077170  |
| 36 | 6 | 0 | 7.561655  | 1.692785  | -0.325985 |
| 37 | 1 | 0 | 7.291941  | 2.746068  | -0.424638 |
| 38 | 1 | 0 | 8.218748  | 1.564685  | 0.542458  |
| 39 | 1 | 0 | 8.138955  | 1.380478  | -1.204440 |
| 40 | 7 | 0 | 0.488734  | -1.607859 | 0.402085  |
| 41 | 1 | 0 | 0.562698  | -2.426307 | 1.002107  |
| 42 | 1 | 0 | 0.041997  | -1.877375 | -0.480201 |
| 43 | 8 | 0 | -1.892952 | -1.334865 | -1.456267 |
| 44 | 8 | 0 | -1.570121 | -1.438572 | 2.265571  |
| 45 | 6 | 0 | -2.743607 | -1.201169 | 2.983526  |
| 46 | 1 | 0 | -2.782758 | -1.869184 | 3.861288  |
| 47 | 1 | 0 | -2.826600 | -0.167490 | 3.364447  |
| 48 | 1 | 0 | -3.656887 | -1.397947 | 2.391752  |
| 49 | 6 | 0 | -2.841125 | -5.341066 | -0.607535 |
| 50 | 6 | 0 | -3.987326 | -4.330970 | -0.436402 |
| 51 | 6 | 0 | -3.446977 | -2.897745 | -0.344082 |
| 52 | 6 | 0 | -2.696595 | -2.517662 | -1.626748 |
| 53 | 6 | 0 | -1.760609 | -3.612861 | -2.070925 |
| 54 | 6 | 0 | -1.816878 | -4.866403 | -1.609137 |
| 55 | 1 | 0 | -2.345152 | -5.515343 | 0.360348  |
| 56 | 1 | 0 | -4.669675 | -4.412257 | -1.294469 |
| 57 | 1 | 0 | -4.264813 | -2.186115 | -0.171901 |
| 58 | 1 | 0 | -2.434389 | -0.646863 | -1.021206 |
| 59 | 1 | 0 | -1.016839 | -3.325810 | -2.813476 |
| 60 | 1 | 0 | -1.097334 | -5.601198 | -1.969890 |
| 61 | 1 | 0 | -2.758396 | -2.799913 | 0.505118  |
| 62 | 1 | 0 | -4.575328 | -4.572726 | 0.456421  |
| 63 | 1 | 0 | -3.234332 | -6.319267 | -0.916933 |
| 64 | 1 | 0 | -3.424454 | -2.323355 | -2.434193 |

-----

**17TS18 C<sub>1</sub>**

Standard orientation:

-----

| Center<br>Number | Atomic<br>Number | Atomic<br>Type | Coordinates (Angstroms) |   |   |
|------------------|------------------|----------------|-------------------------|---|---|
|                  |                  |                | X                       | Y | Z |



---

|    |    |   |           |           |           |
|----|----|---|-----------|-----------|-----------|
| 1  | 29 | 0 | -1.291632 | 0.477067  | -0.660176 |
| 2  | 6  | 0 | 5.354223  | -2.923294 | -0.097908 |
| 3  | 6  | 0 | 3.228035  | -2.039023 | -0.096320 |
| 4  | 6  | 0 | 3.758392  | -0.715644 | -0.112261 |
| 5  | 6  | 0 | 5.863932  | -1.573682 | -0.106625 |
| 6  | 1  | 0 | 1.475920  | -3.263301 | -0.133399 |
| 7  | 6  | 0 | 1.830979  | -2.239131 | -0.100463 |
| 8  | 6  | 0 | 2.868378  | 0.382295  | -0.128152 |
| 9  | 6  | 0 | 1.509006  | 0.167382  | -0.127105 |
| 10 | 6  | 0 | 0.965921  | -1.155589 | -0.102364 |
| 11 | 1  | 0 | 3.276215  | 1.388520  | -0.140744 |
| 12 | 6  | 0 | -1.091625 | -2.294446 | 0.222991  |
| 13 | 6  | 0 | -2.500707 | -2.465018 | 0.224465  |
| 14 | 6  | 0 | -3.415257 | -1.409499 | -0.126283 |
| 15 | 6  | 0 | -3.005814 | -3.737418 | 0.621947  |
| 16 | 6  | 0 | -4.821887 | -1.701369 | -0.067445 |
| 17 | 6  | 0 | -4.352616 | -4.008520 | 0.671705  |
| 18 | 1  | 0 | -2.288106 | -4.512683 | 0.886701  |
| 19 | 6  | 0 | -5.242023 | -2.957865 | 0.316522  |
| 20 | 1  | 0 | -6.313143 | -3.155313 | 0.351176  |
| 21 | 1  | 0 | -0.512807 | -3.150454 | 0.581230  |
| 22 | 7  | 0 | -0.443194 | -1.214645 | -0.144526 |
| 23 | 8  | 0 | -3.052391 | -0.215608 | -0.474728 |
| 24 | 6  | 0 | -5.790992 | -0.608755 | -0.432554 |
| 25 | 1  | 0 | -5.665987 | 0.264895  | 0.218411  |
| 26 | 1  | 0 | -5.619392 | -0.253697 | -1.455527 |
| 27 | 1  | 0 | -6.825717 | -0.957071 | -0.352790 |
| 28 | 6  | 0 | -4.890862 | -5.357767 | 1.083154  |
| 29 | 1  | 0 | -5.483675 | -5.818614 | 0.282127  |
| 30 | 1  | 0 | -4.079990 | -6.049316 | 1.334241  |
| 31 | 1  | 0 | -5.546082 | -5.281658 | 1.960787  |
| 32 | 7  | 0 | 4.058710  | -3.129489 | -0.094187 |
| 33 | 7  | 0 | 5.109142  | -0.508238 | -0.115860 |
| 34 | 8  | 0 | 7.208051  | -1.427864 | -0.106799 |
| 35 | 1  | 0 | 7.377945  | -0.467612 | -0.115249 |
| 36 | 6  | 0 | 6.296904  | -4.092301 | -0.093831 |
| 37 | 1  | 0 | 5.722982  | -5.021004 | -0.088772 |
| 38 | 1  | 0 | 6.950531  | -4.072581 | -0.974063 |
| 39 | 1  | 0 | 6.953097  | -4.064487 | 0.784296  |
| 40 | 7  | 0 | 0.538820  | 1.226883  | -0.174135 |
| 41 | 1  | 0 | 0.783330  | 1.961883  | -0.836472 |
| 42 | 1  | 0 | 0.376234  | 1.701278  | 0.729296  |
| 43 | 8  | 0 | -0.491481 | 2.860688  | 1.979803  |
| 44 | 8  | 0 | -1.669949 | 2.130079  | -1.367478 |
| 45 | 6  | 0 | -2.894479 | 2.453880  | -1.958879 |

|    |   |   |           |          |           |
|----|---|---|-----------|----------|-----------|
| 46 | 1 | 0 | -2.927799 | 2.195431 | -3.033896 |
| 47 | 1 | 0 | -3.748983 | 1.950840 | -1.479917 |
| 48 | 1 | 0 | -3.074302 | 3.542045 | -1.888652 |
| 49 | 6 | 0 | 0.931582  | 5.979945 | -0.460482 |
| 50 | 6 | 0 | -0.494308 | 6.155881 | 0.086032  |
| 51 | 6 | 0 | -1.060877 | 4.821290 | 0.589085  |
| 52 | 6 | 0 | -0.199407 | 4.258641 | 1.725333  |
| 53 | 6 | 0 | 1.273545  | 4.353073 | 1.419378  |
| 54 | 6 | 0 | 1.776313  | 5.112723 | 0.440353  |
| 55 | 1 | 0 | 0.897262  | 5.531294 | -1.465589 |
| 56 | 1 | 0 | -0.475604 | 6.882271 | 0.910742  |
| 57 | 1 | 0 | -2.091783 | 4.955594 | 0.944944  |
| 58 | 1 | 0 | -1.424089 | 2.715694 | 1.748534  |
| 59 | 1 | 0 | 1.929345  | 3.761853 | 2.057272  |
| 60 | 1 | 0 | 2.853542  | 5.125338 | 0.275327  |
| 61 | 1 | 0 | -1.097464 | 4.080603 | -0.222175 |
| 62 | 1 | 0 | -1.148008 | 6.574343 | -0.687504 |
| 63 | 1 | 0 | 1.415158  | 6.957681 | -0.590779 |
| 64 | 1 | 0 | -0.407619 | 4.808622 | 2.658322  |

-----

**18 C<sub>1</sub>**

Standard orientation:

| Center<br>Number | Atomic<br>Number | Atomic<br>Type | Coordinates (Angstroms) |           |           |
|------------------|------------------|----------------|-------------------------|-----------|-----------|
|                  |                  |                | X                       | Y         | Z         |
| 1                | 29               | 0              | 1.072897                | 0.247366  | -0.887574 |
| 2                | 6                | 0              | -6.349160               | -0.101442 | 0.327157  |
| 3                | 6                | 0              | -4.071652               | 0.152846  | 0.103011  |
| 4                | 6                | 0              | -3.940903               | -1.208217 | -0.299538 |
| 5                | 6                | 0              | -6.186976               | -1.477509 | -0.077534 |
| 6                | 1                | 0              | -3.092110               | 2.017702  | 0.443386  |
| 7                | 6                | 0              | -2.931398               | 0.979804  | 0.174400  |
| 8                | 6                | 0              | -2.659010               | -1.708984 | -0.618457 |
| 9                | 6                | 0              | -1.556868               | -0.888705 | -0.534073 |
| 10               | 6                | 0              | -1.673656               | 0.476322  | -0.127033 |
| 11               | 1                | 0              | -2.565919               | -2.746328 | -0.926162 |
| 12               | 6                | 0              | -0.377252               | 2.393136  | 0.412500  |
| 13               | 6                | 0              | 0.743329                | 3.259858  | 0.354689  |
| 14               | 6                | 0              | 1.943732                | 2.931028  | -0.368018 |
| 15               | 6                | 0              | 0.639863                | 4.515412  | 1.022667  |
| 16               | 6                | 0              | 2.988375                | 3.916712  | -0.411229 |
| 17               | 6                | 0              | 1.650331                | 5.446482  | 0.989765  |
| 18               | 1                | 0              | -0.278335               | 4.731984  | 1.566757  |
| 19               | 6                | 0              | 2.820596                | 5.113686  | 0.253521  |

|    |   |   |           |           |           |
|----|---|---|-----------|-----------|-----------|
| 20 | 1 | 0 | 3.628829  | 5.843390  | 0.213552  |
| 21 | 1 | 0 | -1.238339 | 2.774640  | 0.967310  |
| 22 | 7 | 0 | -0.465318 | 1.202392  | -0.135017 |
| 23 | 8 | 0 | 2.134858  | 1.808831  | -0.988104 |
| 24 | 6 | 0 | 4.240861  | 3.593040  | -1.180920 |
| 25 | 1 | 0 | 4.729320  | 2.696462  | -0.781482 |
| 26 | 1 | 0 | 4.013321  | 3.374007  | -2.230900 |
| 27 | 1 | 0 | 4.952122  | 4.424304  | -1.143984 |
| 28 | 6 | 0 | 1.546312  | 6.777402  | 1.694891  |
| 29 | 1 | 0 | 1.640857  | 7.615837  | 0.992512  |
| 30 | 1 | 0 | 0.584588  | 6.881570  | 2.207694  |
| 31 | 1 | 0 | 2.337669  | 6.899986  | 2.445936  |
| 32 | 7 | 0 | -5.299865 | 0.681176  | 0.407834  |
| 33 | 7 | 0 | -5.038478 | -2.018174 | -0.382640 |
| 34 | 8 | 0 | -7.306798 | -2.231718 | -0.138946 |
| 35 | 1 | 0 | -7.022771 | -3.119925 | -0.424512 |
| 36 | 6 | 0 | -7.711417 | 0.438467  | 0.655249  |
| 37 | 1 | 0 | -7.627362 | 1.490666  | 0.933966  |
| 38 | 1 | 0 | -8.388969 | 0.341028  | -0.201366 |
| 39 | 1 | 0 | -8.167126 | -0.121955 | 1.480304  |
| 40 | 7 | 0 | -0.224537 | -1.326442 | -0.862863 |
| 41 | 1 | 0 | -0.200202 | -1.868852 | -1.725654 |
| 42 | 1 | 0 | 0.208614  | -1.923714 | -0.130562 |
| 43 | 8 | 0 | 1.682205  | -2.421476 | 0.849628  |
| 44 | 8 | 0 | 2.427746  | -0.989821 | -1.220178 |
| 45 | 6 | 0 | 3.754244  | -0.616650 | -1.488369 |
| 46 | 1 | 0 | 4.363236  | -1.522278 | -1.643132 |
| 47 | 1 | 0 | 3.837227  | -0.004315 | -2.399078 |
| 48 | 1 | 0 | 4.212659  | -0.038996 | -0.668415 |
| 49 | 6 | 0 | 4.660812  | -5.445719 | 0.568020  |
| 50 | 6 | 0 | 4.395903  | -4.828955 | 1.951906  |
| 51 | 6 | 0 | 3.656958  | -3.490026 | 1.826537  |
| 52 | 6 | 0 | 2.290018  | -3.677448 | 1.152731  |
| 53 | 6 | 0 | 2.406711  | -4.552561 | -0.076082 |
| 54 | 6 | 0 | 3.462522  | -5.328593 | -0.341583 |
| 55 | 1 | 0 | 5.523104  | -4.951110 | 0.092933  |
| 56 | 1 | 0 | 3.785694  | -5.524431 | 2.545451  |
| 57 | 1 | 0 | 3.519631  | -3.014481 | 2.804331  |
| 58 | 1 | 0 | 2.184079  | -1.962082 | 0.105352  |
| 59 | 1 | 0 | 1.564244  | -4.517624 | -0.766149 |
| 60 | 1 | 0 | 3.480124  | -5.913573 | -1.260935 |
| 61 | 1 | 0 | 4.250178  | -2.797630 | 1.212936  |
| 62 | 1 | 0 | 5.338936  | -4.697910 | 2.496171  |
| 63 | 1 | 0 | 4.949135  | -6.501369 | 0.669339  |
| 64 | 1 | 0 | 1.603204  | -4.154121 | 1.868388  |

---

**19 C<sub>1</sub>**

Standard orientation:

| Center<br>Number | Atomic<br>Number | Atomic<br>Type | Coordinates (Angstroms) |           |           |
|------------------|------------------|----------------|-------------------------|-----------|-----------|
|                  |                  |                | X                       | Y         | Z         |
| 1                | 8                | 0              | 2.365379                | -0.010639 | -0.199102 |
| 2                | 6                | 0              | -1.885342               | 0.157494  | -0.238553 |
| 3                | 6                | 0              | -1.232820               | -1.144287 | 0.256769  |
| 4                | 6                | 0              | 0.230619                | -1.232857 | -0.195451 |
| 5                | 6                | 0              | 1.055590                | -0.071611 | 0.376176  |
| 6                | 6                | 0              | 0.329647                | 1.244950  | 0.219844  |
| 7                | 6                | 0              | -0.971657               | 1.347445  | -0.071963 |
| 8                | 1                | 0              | -2.163660               | 0.060846  | -1.300435 |
| 9                | 1                | 0              | -1.272912               | -1.172512 | 1.354585  |
| 10               | 1                | 0              | 0.685679                | -2.185879 | 0.096556  |
| 11               | 1                | 0              | 2.249039                | 0.216698  | -1.136266 |
| 12               | 1                | 0              | 0.941871                | 2.136301  | 0.350968  |
| 13               | 1                | 0              | -1.417435               | 2.334236  | -0.195620 |
| 14               | 1                | 0              | 0.275730                | -1.180626 | -1.294074 |
| 15               | 1                | 0              | -1.799104               | -2.013008 | -0.099526 |
| 16               | 1                | 0              | -2.829281               | 0.338353  | 0.293945  |
| 17               | 1                | 0              | 1.250817                | -0.256102 | 1.441747  |

**20 C<sub>1</sub>**

Standard orientation:

| Center<br>Number | Atomic<br>Number | Atomic<br>Type | Coordinates (Angstroms) |           |           |
|------------------|------------------|----------------|-------------------------|-----------|-----------|
|                  |                  |                | X                       | Y         | Z         |
| 1                | 29               | 0              | 1.289297                | -1.688267 | -0.036604 |
| 2                | 6                | 0              | -5.430383               | 1.537636  | 0.345196  |
| 3                | 6                | 0              | -3.281986               | 0.750586  | 0.084950  |
| 4                | 6                | 0              | -3.778674               | -0.536910 | -0.271944 |
| 5                | 6                | 0              | -5.905497               | 0.225791  | -0.025994 |
| 6                | 1                | 0              | -1.562424               | 1.964373  | 0.458132  |
| 7                | 6                | 0              | -1.891340               | 0.981265  | 0.140014  |
| 8                | 6                | 0              | -2.859786               | -1.568397 | -0.572078 |
| 9                | 6                | 0              | -1.507551               | -1.322756 | -0.515736 |
| 10               | 6                | 0              | -0.995192               | -0.032273 | -0.167928 |
| 11               | 1                | 0              | -3.244604               | -2.547536 | -0.841722 |
| 12               | 6                | 0              | 1.036965                | 1.206463  | -0.145724 |
| 13               | 6                | 0              | 2.442611                | 1.388070  | -0.090163 |
| 14               | 6                | 0              | 3.377100                | 0.289801  | -0.042037 |

|    |   |   |           |           |           |
|----|---|---|-----------|-----------|-----------|
| 15 | 6 | 0 | 2.928269  | 2.729392  | -0.109199 |
| 16 | 6 | 0 | 4.779325  | 0.611007  | -0.011405 |
| 17 | 6 | 0 | 4.269565  | 3.024838  | -0.073882 |
| 18 | 1 | 0 | 2.197881  | 3.536429  | -0.148530 |
| 19 | 6 | 0 | 5.177582  | 1.930701  | -0.024628 |
| 20 | 1 | 0 | 6.245075  | 2.147883  | 0.002614  |
| 21 | 1 | 0 | 0.444214  | 2.121176  | -0.238729 |
| 22 | 7 | 0 | 0.408800  | 0.054161  | -0.114404 |
| 23 | 8 | 0 | 3.041454  | -0.960038 | -0.040271 |
| 24 | 6 | 0 | 5.764330  | -0.526301 | 0.036408  |
| 25 | 1 | 0 | 5.597421  | -1.155795 | 0.918326  |
| 26 | 1 | 0 | 5.649670  | -1.184796 | -0.832751 |
| 27 | 1 | 0 | 6.793864  | -0.155257 | 0.060625  |
| 28 | 6 | 0 | 4.785462  | 4.443526  | -0.085273 |
| 29 | 1 | 0 | 5.441131  | 4.628678  | -0.946184 |
| 30 | 1 | 0 | 3.963312  | 5.164973  | -0.133560 |
| 31 | 1 | 0 | 5.371697  | 4.667979  | 0.815485  |
| 32 | 7 | 0 | -4.141371 | 1.773630  | 0.394441  |
| 33 | 7 | 0 | -5.122906 | -0.776370 | -0.322341 |
| 34 | 8 | 0 | -7.244562 | 0.049160  | -0.060286 |
| 35 | 1 | 0 | -7.392402 | -0.879081 | -0.320317 |
| 36 | 6 | 0 | -6.403499 | 2.632129  | 0.675868  |
| 37 | 1 | 0 | -5.854838 | 3.539954  | 0.933833  |
| 38 | 1 | 0 | -7.067803 | 2.835828  | -0.172468 |
| 39 | 1 | 0 | -7.047238 | 2.343652  | 1.515339  |
| 40 | 7 | 0 | -0.507283 | -2.329360 | -0.796526 |
| 41 | 1 | 0 | -0.434443 | -2.528253 | -1.794618 |
| 42 | 1 | 0 | -0.665667 | -3.216753 | -0.317509 |
| 43 | 8 | 0 | 1.542315  | -3.391896 | 0.559874  |
| 44 | 6 | 0 | 2.766136  | -3.895551 | 1.001632  |
| 45 | 1 | 0 | 2.595763  | -4.707555 | 1.730330  |
| 46 | 1 | 0 | 3.372019  | -4.325128 | 0.181810  |
| 47 | 1 | 0 | 3.392817  | -3.137361 | 1.500235  |

-----

**4TS5,6 C<sub>1</sub>**

Standard orientation:

| Center<br>Number | Atomic<br>Number | Atomic<br>Type | Coordinates (Angstroms) |           |           |
|------------------|------------------|----------------|-------------------------|-----------|-----------|
|                  |                  |                | X                       | Y         | Z         |
| 1                | 29               | 0              | -1.200810               | -1.427701 | -0.464240 |
| 2                | 6                | 0              | 5.676640                | 1.384269  | -0.087090 |
| 3                | 6                | 0              | 3.475380                | 0.707619  | -0.008230 |
| 4                | 6                | 0              | 3.879910                | -0.649401 | 0.151290  |
| 5                | 6                | 0              | 6.059230                | 0.000339  | 0.083860  |

|    |   |   |           |           |           |
|----|---|---|-----------|-----------|-----------|
| 6  | 1 | 0 | 1.838260  | 2.072099  | -0.231870 |
| 7  | 6 | 0 | 2.103720  | 1.034349  | -0.063120 |
| 8  | 6 | 0 | 2.892810  | -1.655521 | 0.262830  |
| 9  | 6 | 0 | 1.561820  | -1.313151 | 0.212590  |
| 10 | 6 | 0 | 1.143820  | 0.041279  | 0.054700  |
| 11 | 1 | 0 | 3.204140  | -2.687871 | 0.389410  |
| 12 | 6 | 0 | -0.814910 | 1.382179  | 0.184010  |
| 13 | 6 | 0 | -2.206680 | 1.666449  | 0.093000  |
| 14 | 6 | 0 | -3.193020 | 0.665129  | -0.209400 |
| 15 | 6 | 0 | -2.610690 | 3.011089  | 0.334860  |
| 16 | 6 | 0 | -4.565820 | 1.079929  | -0.266680 |
| 17 | 6 | 0 | -3.930090 | 3.401799  | 0.277530  |
| 18 | 1 | 0 | -1.838950 | 3.743009  | 0.566020  |
| 19 | 6 | 0 | -4.890840 | 2.402469  | -0.029160 |
| 20 | 1 | 0 | -5.939750 | 2.692289  | -0.078990 |
| 21 | 1 | 0 | -0.177910 | 2.219449  | 0.477510  |
| 22 | 7 | 0 | -0.253140 | 0.220589  | -0.040470 |
| 23 | 8 | 0 | -2.921450 | -0.591531 | -0.418970 |
| 24 | 6 | 0 | -5.617430 | 0.049219  | -0.585600 |
| 25 | 1 | 0 | -5.611580 | -0.766971 | 0.147010  |
| 26 | 1 | 0 | -6.615550 | 0.497549  | -0.594200 |
| 27 | 1 | 0 | -5.438870 | -0.413111 | -1.564350 |
| 28 | 6 | 0 | -4.361500 | 4.827679  | 0.526040  |
| 29 | 1 | 0 | -5.062560 | 4.895429  | 1.367800  |
| 30 | 1 | 0 | -3.503130 | 5.467459  | 0.753920  |
| 31 | 1 | 0 | -4.872560 | 5.252089  | -0.347690 |
| 32 | 7 | 0 | 4.406590  | 1.708389  | -0.131020 |
| 33 | 7 | 0 | 5.205320  | -0.981661 | 0.196230  |
| 34 | 8 | 0 | 7.381090  | -0.258671 | 0.123960  |
| 35 | 1 | 0 | 7.485840  | -1.222051 | 0.240920  |
| 36 | 6 | 0 | 6.726480  | 2.449249  | -0.214350 |
| 37 | 1 | 0 | 6.248930  | 3.423009  | -0.339720 |
| 38 | 1 | 0 | 7.368490  | 2.473249  | 0.674110  |
| 39 | 1 | 0 | 7.380150  | 2.253509  | -1.072490 |
| 40 | 7 | 0 | 0.493840  | -2.286671 | 0.308830  |
| 41 | 1 | 0 | 0.277130  | -2.491141 | 1.287650  |
| 42 | 1 | 0 | 0.761140  | -3.174101 | -0.116110 |
| 43 | 8 | 0 | -1.734550 | -2.939511 | -1.297900 |
| 44 | 8 | 0 | -3.647950 | -4.325681 | 0.414820  |
| 45 | 6 | 0 | -3.369190 | -3.562651 | 1.521600  |
| 46 | 1 | 0 | -2.425940 | -3.829261 | 2.026170  |
| 47 | 1 | 0 | -3.401750 | -2.485041 | 1.297560  |
| 48 | 1 | 0 | -4.195200 | -3.751541 | 2.237910  |

---

5 C<sub>1</sub>

Standard orientation:

| Center<br>Number | Atomic<br>Number | Atomic<br>Type | Coordinates (Angstroms) |           |           |
|------------------|------------------|----------------|-------------------------|-----------|-----------|
|                  |                  |                | X                       | Y         | Z         |
| 1                | 6                | 0              | 0.575017                | 0.000209  | -0.012882 |
| 2                | 1                | 0              | 0.871214                | -0.007846 | 1.057348  |
| 3                | 1                | 0              | 1.014774                | 0.911965  | -0.451469 |
| 4                | 1                | 0              | 1.014129                | -0.906015 | -0.463614 |
| 5                | 8                | 0              | -0.793778               | 0.000080  | -0.008121 |

6 C<sub>1</sub>

Standard orientation:

| Center<br>Number | Atomic<br>Number | Atomic<br>Type | Coordinates (Angstroms) |           |           |
|------------------|------------------|----------------|-------------------------|-----------|-----------|
|                  |                  |                | X                       | Y         | Z         |
| 1                | 29               | 0              | -1.320290               | -1.921576 | 0.171316  |
| 2                | 8                | 0              | -1.603361               | -3.557840 | 0.807821  |
| 3                | 6                | 0              | 5.248143                | 1.614351  | 0.245887  |
| 4                | 6                | 0              | 3.132555                | 0.725049  | 0.055011  |
| 5                | 6                | 0              | 3.680410                | -0.560416 | -0.225633 |
| 6                | 6                | 0              | 5.775134                | 0.302234  | -0.047024 |
| 7                | 1                | 0              | 1.365993                | 1.886730  | 0.372559  |
| 8                | 6                | 0              | 1.733868                | 0.900963  | 0.110215  |
| 9                | 6                | 0              | 2.803396                | -1.644733 | -0.456523 |
| 10               | 6                | 0              | 1.443283                | -1.448928 | -0.403661 |
| 11               | 6                | 0              | 0.877588                | -0.165704 | -0.124234 |
| 12               | 1                | 0              | 3.227806                | -2.620744 | -0.673694 |
| 13               | 6                | 0              | -1.208093               | 0.977872  | -0.142246 |
| 14               | 6                | 0              | -2.617835               | 1.098804  | -0.082081 |
| 15               | 6                | 0              | -3.499960               | -0.040037 | 0.014662  |
| 16               | 6                | 0              | -3.166126               | 2.414858  | -0.155129 |
| 17               | 6                | 0              | -4.916744               | 0.216451  | 0.038366  |
| 18               | 6                | 0              | -4.519058               | 2.647497  | -0.124836 |
| 19               | 1                | 0              | -2.474532               | 3.252900  | -0.231179 |
| 20               | 6                | 0              | -5.375211               | 1.514074  | -0.026505 |
| 21               | 1                | 0              | -6.451493               | 1.682711  | -0.002616 |
| 22               | 1                | 0              | -0.657996               | 1.911072  | -0.293537 |
| 23               | 7                | 0              | -0.526280               | -0.142328 | -0.053655 |
| 24               | 8                | 0              | -3.108144               | -1.270266 | 0.058514  |
| 25               | 6                | 0              | -5.845736               | -0.963836 | 0.135702  |
| 26               | 1                | 0              | -6.891660               | -0.641540 | 0.155880  |
| 27               | 1                | 0              | -5.705555               | -1.646774 | -0.710471 |
| 28               | 1                | 0              | -5.641125               | -1.552825 | 1.037278  |

|    |   |   |           |           |           |
|----|---|---|-----------|-----------|-----------|
| 29 | 6 | 0 | -5.102265 | 4.038242  | -0.191350 |
| 30 | 1 | 0 | -5.764850 | 4.158174  | -1.058542 |
| 31 | 1 | 0 | -5.699937 | 4.268939  | 0.700247  |
| 32 | 1 | 0 | -4.315610 | 4.795935  | -0.267926 |
| 33 | 7 | 0 | 3.950766  | 1.799767  | 0.292234  |
| 34 | 7 | 0 | 5.032705  | -0.747805 | -0.273237 |
| 35 | 8 | 0 | 7.119761  | 0.179053  | -0.082230 |
| 36 | 1 | 0 | 7.305259  | -0.756631 | -0.285213 |
| 37 | 6 | 0 | 6.177142  | 2.766346  | 0.498608  |
| 38 | 1 | 0 | 6.837697  | 2.557439  | 1.348461  |
| 39 | 1 | 0 | 6.826772  | 2.943334  | -0.366891 |
| 40 | 1 | 0 | 5.593177  | 3.665390  | 0.704480  |
| 41 | 7 | 0 | 0.488259  | -2.518145 | -0.616629 |
| 42 | 1 | 0 | 0.800642  | -3.401065 | -0.214626 |
| 43 | 1 | 0 | 0.326675  | -2.683874 | -1.611561 |

-----

**6 C<sub>1</sub> open shell singlet (broken symmetry)**

Standard orientation:

| Center<br>Number | Atomic<br>Number | Atomic<br>Type | Coordinates (Angstroms) |           |           |
|------------------|------------------|----------------|-------------------------|-----------|-----------|
|                  |                  |                | X                       | Y         | Z         |
| 1                | 29               | 0              | -1.321057               | -1.925220 | 0.158739  |
| 2                | 8                | 0              | -1.631368               | -3.583944 | 0.753504  |
| 3                | 6                | 0              | 5.240713                | 1.617626  | 0.257645  |
| 4                | 6                | 0              | 3.128814                | 0.721872  | 0.056977  |
| 5                | 6                | 0              | 3.681699                | -0.561266 | -0.224215 |
| 6                | 6                | 0              | 5.772969                | 0.307794  | -0.036159 |
| 7                | 1                | 0              | 1.357674                | 1.876826  | 0.373081  |
| 8                | 6                | 0              | 1.729335                | 0.893254  | 0.107977  |
| 9                | 6                | 0              | 2.808971                | -1.647972 | -0.459967 |
| 10               | 6                | 0              | 1.448017                | -1.456453 | -0.412032 |
| 11               | 6                | 0              | 0.877796                | -0.175771 | -0.132327 |
| 12               | 1                | 0              | 3.236874                | -2.622449 | -0.676996 |
| 13               | 6                | 0              | -1.205923               | 0.968255  | -0.161498 |
| 14               | 6                | 0              | -2.613356               | 1.099064  | -0.092908 |
| 15               | 6                | 0              | -3.498375               | -0.033712 | 0.034772  |
| 16               | 6                | 0              | -3.156598               | 2.416252  | -0.183188 |
| 17               | 6                | 0              | -4.913799               | 0.228081  | 0.073478  |
| 18               | 6                | 0              | -4.508132               | 2.654354  | -0.140734 |
| 19               | 1                | 0              | -2.462671               | 3.249866  | -0.282587 |
| 20               | 6                | 0              | -5.367474               | 1.526256  | -0.010178 |
| 21               | 1                | 0              | -6.442634               | 1.700070  | 0.024190  |
| 22               | 1                | 0              | -0.650474               | 1.895769  | -0.325366 |
| 23               | 7                | 0              | -0.527492               | -0.154405 | -0.065583 |



|    |   |   |           |           |           |
|----|---|---|-----------|-----------|-----------|
| 24 | 8 | 0 | -3.107980 | -1.263231 | 0.095879  |
| 25 | 6 | 0 | -5.845672 | -0.946455 | 0.205264  |
| 26 | 1 | 0 | -6.889951 | -0.619594 | 0.234195  |
| 27 | 1 | 0 | -5.720002 | -1.645288 | -0.630141 |
| 28 | 1 | 0 | -5.630625 | -1.519810 | 1.114445  |
| 29 | 6 | 0 | -5.087294 | 4.045744  | -0.226168 |
| 30 | 1 | 0 | -5.759950 | 4.151784  | -1.087375 |
| 31 | 1 | 0 | -5.673233 | 4.295192  | 0.668142  |
| 32 | 1 | 0 | -4.298995 | 4.798929  | -0.326497 |
| 33 | 7 | 0 | 3.942568  | 1.798705  | 0.299661  |
| 34 | 7 | 0 | 5.034773  | -0.744165 | -0.267229 |
| 35 | 8 | 0 | 7.118048  | 0.189010  | -0.066518 |
| 36 | 1 | 0 | 7.307411  | -0.745654 | -0.270678 |
| 37 | 6 | 0 | 6.165041  | 2.772000  | 0.516490  |
| 38 | 1 | 0 | 6.823234  | 2.563191  | 1.368197  |
| 39 | 1 | 0 | 6.817185  | 2.953177  | -0.346250 |
| 40 | 1 | 0 | 5.577427  | 3.668652  | 0.722420  |
| 41 | 7 | 0 | 0.494786  | -2.525294 | -0.627039 |
| 42 | 1 | 0 | 0.802550  | -3.408254 | -0.221424 |
| 43 | 1 | 0 | 0.334404  | -2.693140 | -1.621747 |

-----

**5,7TS8,9 C<sub>1</sub>**

Standard orientation:

| Center<br>Number | Atomic<br>Number | Atomic<br>Type | Coordinates (Angstroms) |           |           |
|------------------|------------------|----------------|-------------------------|-----------|-----------|
|                  |                  |                | X                       | Y         | Z         |
| 1                | 8                | 0              | 2.104349                | 0.208368  | -0.862662 |
| 2                | 6                | 0              | -2.280219               | -0.461156 | -0.514978 |
| 3                | 6                | 0              | -1.059778               | -1.360241 | -0.256985 |
| 4                | 6                | 0              | -0.285572               | -0.903092 | 0.987135  |
| 5                | 6                | 0              | 0.177715                | 0.540857  | 0.817116  |
| 6                | 6                | 0              | -0.841081               | 1.447955  | 0.258377  |
| 7                | 6                | 0              | -1.960426               | 1.001252  | -0.346562 |
| 8                | 1                | 0              | -2.676659               | -0.638350 | -1.524372 |
| 9                | 1                | 0              | -1.375744               | -2.405228 | -0.155017 |
| 10               | 1                | 0              | -0.928061               | -0.974497 | 1.878480  |
| 11               | 1                | 0              | 0.683422                | 0.949925  | 1.700256  |
| 12               | 1                | 0              | -0.659479               | 2.519008  | 0.328927  |
| 13               | 1                | 0              | -2.688411               | 1.718778  | -0.722735 |
| 14               | 1                | 0              | 1.085417                | 0.499679  | -0.005018 |
| 15               | 1                | 0              | 0.574534                | -1.559230 | 1.165950  |
| 16               | 1                | 0              | -0.380718               | -1.308985 | -1.117199 |
| 17               | 1                | 0              | -3.102183               | -0.727470 | 0.170342  |
| 18               | 6                | 0              | 3.233046                | -0.114798 | -0.113271 |

|    |   |   |          |           |           |
|----|---|---|----------|-----------|-----------|
| 19 | 1 | 0 | 4.030132 | -0.350442 | -0.838041 |
| 20 | 1 | 0 | 3.599754 | 0.714866  | 0.515157  |
| 21 | 1 | 0 | 3.101101 | -1.009661 | 0.519589  |

---

### 8 C<sub>s</sub>

Standard orientation:

| Center<br>Number | Atomic<br>Number | Atomic<br>Type | Coordinates (Angstroms) |           |           |
|------------------|------------------|----------------|-------------------------|-----------|-----------|
|                  |                  |                | X                       | Y         | Z         |
| 1                | 8                | 0              | 0.046868                | -0.757690 | 0.000000  |
| 2                | 6                | 0              | 0.046868                | 0.660853  | 0.000000  |
| 3                | 1                | 0              | -0.437012               | 1.086274  | 0.893285  |
| 4                | 1                | 0              | 1.094153                | 0.974885  | 0.000000  |
| 5                | 1                | 0              | -0.437012               | 1.086274  | -0.893285 |
| 6                | 1                | 0              | -0.876287               | -1.051030 | 0.000000  |

---

### 9 C<sub>s</sub>

Standard orientation:

| Center<br>Number | Atomic<br>Number | Atomic<br>Type | Coordinates (Angstroms) |           |           |
|------------------|------------------|----------------|-------------------------|-----------|-----------|
|                  |                  |                | X                       | Y         | Z         |
| 1                | 6                | 0              | -0.108186               | -0.694320 | 1.274119  |
| 2                | 6                | 0              | 0.502718                | -1.305691 | 0.000000  |
| 3                | 6                | 0              | -0.108186               | -0.694320 | -1.274119 |
| 4                | 6                | 0              | -0.108186               | 0.809006  | -1.218098 |
| 5                | 6                | 0              | -0.098409               | 1.478107  | 0.000000  |
| 6                | 6                | 0              | -0.108186               | 0.809006  | 1.218098  |
| 7                | 1                | 0              | -1.141713               | -1.062139 | 1.400211  |
| 8                | 1                | 0              | 1.582547                | -1.108573 | 0.000000  |
| 9                | 1                | 0              | 0.437306                | -1.045154 | -2.160460 |
| 10               | 1                | 0              | -0.098916               | 2.567160  | 0.000000  |
| 11               | 1                | 0              | -0.139485               | 1.370009  | 2.148664  |
| 12               | 1                | 0              | -1.141713               | -1.062139 | -1.400211 |
| 13               | 1                | 0              | 0.374759                | -2.394745 | 0.000000  |
| 14               | 1                | 0              | 0.437306                | -1.045154 | 2.160460  |
| 15               | 1                | 0              | -0.139485               | 1.370009  | -2.148664 |

---

### 6,7TS9,10 C<sub>1</sub>

Standard orientation:

| Center | Atomic | Atomic | Coordinates (Angstroms) |  |  |
|--------|--------|--------|-------------------------|--|--|
|--------|--------|--------|-------------------------|--|--|

| Number | Number | Type | X         | Y         | Z         |
|--------|--------|------|-----------|-----------|-----------|
| 1      | 29     | 0    | 0.910958  | -0.591486 | -0.956359 |
| 2      | 6      | 0    | -6.210046 | 0.452720  | 0.966887  |
| 3      | 6      | 0    | -4.008634 | 0.405867  | 0.292871  |
| 4      | 6      | 0    | -4.260475 | -0.746515 | -0.507316 |
| 5      | 6      | 0    | -6.437934 | -0.710570 | 0.142926  |
| 6      | 1      | 0    | -2.555302 | 1.801377  | 1.011957  |
| 7      | 6      | 0    | -2.709965 | 0.954481  | 0.352498  |
| 8      | 6      | 0    | -3.196763 | -1.319319 | -1.241767 |
| 9      | 6      | 0    | -1.939512 | -0.765871 | -1.173684 |
| 10     | 6      | 0    | -1.672862 | 0.391967  | -0.377060 |
| 11     | 1      | 0    | -3.396749 | -2.196025 | -1.850871 |
| 12     | 6      | 0    | 0.018419  | 2.023662  | -0.019514 |
| 13     | 6      | 0    | 1.341415  | 2.533141  | 0.011408  |
| 14     | 6      | 0    | 2.489128  | 1.763615  | -0.404554 |
| 15     | 6      | 0    | 1.509916  | 3.883665  | 0.439036  |
| 16     | 6      | 0    | 3.770633  | 2.419146  | -0.377575 |
| 17     | 6      | 0    | 2.740247  | 4.493696  | 0.475410  |
| 18     | 1      | 0    | 0.623122  | 4.436319  | 0.746435  |
| 19     | 6      | 0    | 3.860608  | 3.725839  | 0.052473  |
| 20     | 1      | 0    | 4.842784  | 4.197632  | 0.065770  |
| 21     | 1      | 0    | -0.769972 | 2.731521  | 0.253330  |
| 22     | 7      | 0    | -0.328835 | 0.807040  | -0.368729 |
| 23     | 8      | 0    | 2.441726  | 0.538559  | -0.818009 |
| 24     | 6      | 0    | 4.977144  | 1.641447  | -0.831658 |
| 25     | 1      | 0    | 5.878883  | 2.261267  | -0.800674 |
| 26     | 1      | 0    | 5.142034  | 0.758161  | -0.203264 |
| 27     | 1      | 0    | 4.842884  | 1.267898  | -1.853516 |
| 28     | 6      | 0    | 2.923255  | 5.919453  | 0.936609  |
| 29     | 1      | 0    | 1.965696  | 6.375075  | 1.209156  |
| 30     | 1      | 0    | 3.580803  | 5.979762  | 1.813800  |
| 31     | 1      | 0    | 3.377316  | 6.542448  | 0.154928  |
| 32     | 7      | 0    | -5.012337 | 0.983683  | 1.027023  |
| 33     | 7      | 0    | -5.510477 | -1.294526 | -0.566846 |
| 34     | 8      | 0    | -7.694284 | -1.206957 | 0.122250  |
| 35     | 1      | 0    | -7.673921 | -1.981611 | -0.469852 |
| 36     | 6      | 0    | -7.335742 | 1.057126  | 1.755410  |
| 37     | 1      | 0    | -6.966860 | 1.921705  | 2.310527  |
| 38     | 1      | 0    | -8.153850 | 1.368998  | 1.095245  |
| 39     | 1      | 0    | -7.759303 | 0.327528  | 2.455846  |
| 40     | 7      | 0    | -0.798864 | -1.307543 | -1.880312 |
| 41     | 1      | 0    | -0.784961 | -1.019239 | -2.859550 |
| 42     | 1      | 0    | -0.766106 | -2.326167 | -1.860363 |
| 43     | 8      | 0    | 1.607482  | -2.246005 | -1.082388 |
| 44     | 6      | 0    | 3.792487  | -4.236119 | 2.318617  |

|    |   |   |          |           |           |
|----|---|---|----------|-----------|-----------|
| 45 | 6 | 0 | 3.408616 | -4.694725 | 0.901889  |
| 46 | 6 | 0 | 4.213090 | -3.936822 | -0.163420 |
| 47 | 6 | 0 | 3.958226 | -2.435408 | -0.049501 |
| 48 | 6 | 0 | 3.965168 | -1.929494 | 1.343951  |
| 49 | 6 | 0 | 3.894871 | -2.734319 | 2.419174  |
| 50 | 1 | 0 | 3.059621 | -4.607621 | 3.049145  |
| 51 | 1 | 0 | 3.553007 | -5.778028 | 0.803106  |
| 52 | 1 | 0 | 5.287662 | -4.140414 | -0.031578 |
| 53 | 1 | 0 | 4.591052 | -1.838711 | -0.715798 |
| 54 | 1 | 0 | 4.010632 | -0.850487 | 1.482925  |
| 55 | 1 | 0 | 3.919665 | -2.301376 | 3.418914  |
| 56 | 1 | 0 | 2.860612 | -2.260177 | -0.503257 |
| 57 | 1 | 0 | 3.942156 | -4.283921 | -1.167160 |
| 58 | 1 | 0 | 2.343919 | -4.490605 | 0.731361  |
| 59 | 1 | 0 | 4.753856 | -4.687523 | 2.616413  |

-----

**6,17TS9,10** C<sub>1</sub> open shell singlet (broken symmetry)

Standard orientation:

| Center<br>Number | Atomic<br>Number | Atomic<br>Type | Coordinates (Angstroms) |           |           |
|------------------|------------------|----------------|-------------------------|-----------|-----------|
|                  |                  |                | X                       | Y         | Z         |
| 1                | 29               | 0              | 0.952545                | -0.602388 | -1.069722 |
| 2                | 6                | 0              | -6.098583               | 0.681946  | 0.957713  |
| 3                | 6                | 0              | -3.903905               | 0.553993  | 0.272276  |
| 4                | 6                | 0              | -4.208263               | -0.571203 | -0.547954 |
| 5                | 6                | 0              | -6.379404               | -0.455115 | 0.113301  |
| 6                | 1                | 0              | -2.392466               | 1.875418  | 1.007991  |
| 7                | 6                | 0              | -2.583345               | 1.046615  | 0.335320  |
| 8                | 6                | 0              | -3.172431               | -1.175066 | -1.296913 |
| 9                | 6                | 0              | -1.892883               | -0.676280 | -1.224107 |
| 10               | 6                | 0              | -1.573144               | 0.455090  | -0.409561 |
| 11               | 1                | 0              | -3.410855               | -2.031929 | -1.920235 |
| 12               | 6                | 0              | 0.187468                | 2.004056  | -0.009851 |
| 13               | 6                | 0              | 1.529087                | 2.457542  | 0.028302  |
| 14               | 6                | 0              | 2.640168                | 1.656853  | -0.427824 |
| 15               | 6                | 0              | 1.759204                | 3.780767  | 0.510682  |
| 16               | 6                | 0              | 3.950615                | 2.252094  | -0.379058 |
| 17               | 6                | 0              | 3.015573                | 4.332925  | 0.564570  |
| 18               | 1                | 0              | 0.899429                | 4.358743  | 0.846903  |
| 19               | 6                | 0              | 4.099944                | 3.533880  | 0.104618  |
| 20               | 1                | 0              | 5.102196                | 3.960585  | 0.133904  |
| 21               | 1                | 0              | -0.568593               | 2.730155  | 0.302587  |
| 22               | 7                | 0              | -0.213309               | 0.817080  | -0.405257 |
| 23               | 8                | 0              | 2.535652                | 0.455430  | -0.892687 |

|    |   |   |           |           |           |
|----|---|---|-----------|-----------|-----------|
| 24 | 6 | 0 | 5.117846  | 1.438035  | -0.870175 |
| 25 | 1 | 0 | 6.050679  | 2.006761  | -0.802225 |
| 26 | 1 | 0 | 5.230360  | 0.514034  | -0.290656 |
| 27 | 1 | 0 | 4.970804  | 1.127205  | -1.911118 |
| 28 | 6 | 0 | 3.264498  | 5.728636  | 1.083129  |
| 29 | 1 | 0 | 2.329975  | 6.213866  | 1.383124  |
| 30 | 1 | 0 | 3.930498  | 5.723064  | 1.955982  |
| 31 | 1 | 0 | 3.739947  | 6.363443  | 0.323978  |
| 32 | 7 | 0 | -4.879202 | 1.160222  | 1.021992  |
| 33 | 7 | 0 | -5.480624 | -1.064542 | -0.611672 |
| 34 | 8 | 0 | -7.655823 | -0.896784 | 0.089739  |
| 35 | 1 | 0 | -7.671527 | -1.660279 | -0.516834 |
| 36 | 6 | 0 | -7.194376 | 1.318741  | 1.762591  |
| 37 | 1 | 0 | -6.786896 | 2.156190  | 2.332097  |
| 38 | 1 | 0 | -8.000891 | 1.677486  | 1.112052  |
| 39 | 1 | 0 | -7.646022 | 0.594642  | 2.451076  |
| 40 | 7 | 0 | -0.780354 | -1.252743 | -1.950914 |
| 41 | 1 | 0 | -0.786784 | -0.983091 | -2.935528 |
| 42 | 1 | 0 | -0.763353 | -2.271850 | -1.912702 |
| 43 | 8 | 0 | 1.608547  | -2.268001 | -1.304048 |
| 44 | 6 | 0 | 2.944658  | -4.204851 | 2.490054  |
| 45 | 6 | 0 | 2.686321  | -4.734297 | 1.069528  |
| 46 | 6 | 0 | 3.766850  | -4.249559 | 0.093135  |
| 47 | 6 | 0 | 3.781032  | -2.722346 | 0.041633  |
| 48 | 6 | 0 | 3.697355  | -2.082574 | 1.380958  |
| 49 | 6 | 0 | 3.325388  | -2.744714 | 2.489766  |
| 50 | 1 | 0 | 2.055551  | -4.355922 | 3.119057  |
| 51 | 1 | 0 | 2.629858  | -5.830187 | 1.079054  |
| 52 | 1 | 0 | 4.752804  | -4.618583 | 0.416885  |
| 53 | 1 | 0 | 4.610398  | -2.324453 | -0.555479 |
| 54 | 1 | 0 | 3.935185  | -1.021884 | 1.443747  |
| 55 | 1 | 0 | 3.299312  | -2.222439 | 3.445966  |
| 56 | 1 | 0 | 2.825702  | -2.406230 | -0.579507 |
| 57 | 1 | 0 | 3.586128  | -4.653063 | -0.909703 |
| 58 | 1 | 0 | 1.719021  | -4.359095 | 0.711965  |
| 59 | 1 | 0 | 3.745101  | -4.789613 | 2.973673  |

-----

**10 C<sub>1</sub>**

Standard orientation:

| Center<br>Number | Atomic<br>Number | Atomic<br>Type | Coordinates (Angstroms) |           |          |
|------------------|------------------|----------------|-------------------------|-----------|----------|
|                  |                  |                | X                       | Y         | Z        |
| 1                | 29               | 0              | 1.323196                | -1.899009 | 0.097644 |
| 2                | 6                | 0              | -5.260015               | 1.617971  | 0.259015 |

|    |   |   |           |           |           |
|----|---|---|-----------|-----------|-----------|
| 3  | 6 | 0 | -3.145268 | 0.728596  | 0.059037  |
| 4  | 6 | 0 | -3.693938 | -0.558395 | -0.213413 |
| 5  | 6 | 0 | -5.788049 | 0.304727  | -0.025626 |
| 6  | 1 | 0 | -1.378319 | 1.893409  | 0.358417  |
| 7  | 6 | 0 | -1.746419 | 0.905617  | 0.104002  |
| 8  | 6 | 0 | -2.817758 | -1.643728 | -0.442639 |
| 9  | 6 | 0 | -1.456771 | -1.449523 | -0.398933 |
| 10 | 6 | 0 | -0.891791 | -0.161654 | -0.133206 |
| 11 | 1 | 0 | -3.241874 | -2.621955 | -0.649372 |
| 12 | 6 | 0 | 1.188845  | 0.992279  | -0.163253 |
| 13 | 6 | 0 | 2.599195  | 1.124302  | -0.093147 |
| 14 | 6 | 0 | 3.490674  | -0.002034 | 0.044942  |
| 15 | 6 | 0 | 3.135424  | 2.443258  | -0.185300 |
| 16 | 6 | 0 | 4.902963  | 0.270596  | 0.090639  |
| 17 | 6 | 0 | 4.485682  | 2.692062  | -0.137432 |
| 18 | 1 | 0 | 2.436864  | 3.272102  | -0.292232 |
| 19 | 6 | 0 | 5.350716  | 1.571286  | 0.002889  |
| 20 | 1 | 0 | 6.424796  | 1.751092  | 0.041298  |
| 21 | 1 | 0 | 0.634133  | 1.922304  | -0.317178 |
| 22 | 7 | 0 | 0.514337  | -0.130888 | -0.076574 |
| 23 | 8 | 0 | 3.107046  | -1.235334 | 0.114818  |
| 24 | 6 | 0 | 5.844087  | -0.895675 | 0.233014  |
| 25 | 1 | 0 | 6.886187  | -0.561251 | 0.252674  |
| 26 | 1 | 0 | 5.640345  | -1.457769 | 1.152241  |
| 27 | 1 | 0 | 5.720180  | -1.606095 | -0.592933 |
| 28 | 6 | 0 | 5.054231  | 4.087663  | -0.227503 |
| 29 | 1 | 0 | 4.260312  | 4.833630  | -0.337243 |
| 30 | 1 | 0 | 5.632438  | 4.347746  | 0.668853  |
| 31 | 1 | 0 | 5.731197  | 4.194534  | -1.085244 |
| 32 | 7 | 0 | -3.962435 | 1.804049  | 0.296955  |
| 33 | 7 | 0 | -5.046736 | -0.745875 | -0.252171 |
| 34 | 8 | 0 | -7.133191 | 0.180535  | -0.052444 |
| 35 | 1 | 0 | -7.318312 | -0.756190 | -0.250916 |
| 36 | 6 | 0 | -6.187895 | 2.770766  | 0.512914  |
| 37 | 1 | 0 | -5.602854 | 3.670715  | 0.711829  |
| 38 | 1 | 0 | -6.842747 | 2.944470  | -0.349324 |
| 39 | 1 | 0 | -6.843317 | 2.565143  | 1.367547  |
| 40 | 7 | 0 | -0.498438 | -2.511532 | -0.610789 |
| 41 | 1 | 0 | -0.411534 | -2.759910 | -1.596725 |
| 42 | 1 | 0 | -0.713274 | -3.367801 | -0.099671 |
| 43 | 8 | 0 | 1.608307  | -3.592867 | 0.686823  |
| 44 | 1 | 0 | 2.525233  | -3.710550 | 0.974767  |

-----  
 $O_2 D_{oh}$

Standard orientation:

| Center Number | Atomic Number | Atomic Type | Coordinates (Angstroms) |          |           |
|---------------|---------------|-------------|-------------------------|----------|-----------|
|               |               |             | X                       | Y        | Z         |
| 1             | 8             | 0           | 0.000000                | 0.000000 | 0.607259  |
| 2             | 8             | 0           | 0.000000                | 0.000000 | -0.607259 |

### 11 C<sub>1</sub>

Standard orientation:

| Center Number | Atomic Number | Atomic Type | Coordinates (Angstroms) |           |           |
|---------------|---------------|-------------|-------------------------|-----------|-----------|
|               |               |             | X                       | Y         | Z         |
| 1             | 6             | 0           | 2.140517                | -0.314116 | -0.254179 |
| 2             | 6             | 0           | 0.992166                | -1.331498 | -0.325953 |
| 3             | 6             | 0           | -0.070601               | -1.026902 | 0.736016  |
| 4             | 6             | 0           | -0.647926               | 0.376111  | 0.557720  |
| 5             | 6             | 0           | 0.383914                | 1.414861  | 0.231135  |
| 6             | 6             | 0           | 1.636735                | 1.099433  | -0.116573 |
| 7             | 1             | 0           | 2.801072                | -0.542392 | 0.597974  |
| 8             | 1             | 0           | 0.526697                | -1.282577 | -1.318287 |
| 9             | 1             | 0           | -0.895344               | -1.746487 | 0.705721  |
| 10            | 1             | 0           | 0.072857                | 2.455205  | 0.292647  |
| 11            | 1             | 0           | 2.350853                | 1.899925  | -0.306588 |
| 12            | 1             | 0           | 0.372298                | -1.084995 | 1.739843  |
| 13            | 1             | 0           | 1.376542                | -2.350110 | -0.201609 |
| 14            | 1             | 0           | 2.776946                | -0.390151 | -1.145762 |
| 15            | 1             | 0           | -1.252076               | 0.663660  | 1.423760  |
| 16            | 8             | 0           | -1.611260               | 0.378942  | -0.581688 |
| 17            | 8             | 0           | -2.731074               | -0.245119 | -0.262899 |

### 11TS12 C<sub>1</sub>

Standard orientation:

| Center Number | Atomic Number | Atomic Type | Coordinates (Angstroms) |           |           |
|---------------|---------------|-------------|-------------------------|-----------|-----------|
|               |               |             | X                       | Y         | Z         |
| 1             | 6             | 0           | -2.244386               | 0.050862  | -0.171634 |
| 2             | 6             | 0           | -1.464553               | -1.170557 | 0.340516  |
| 3             | 6             | 0           | -0.069606               | -1.236614 | -0.306232 |
| 4             | 6             | 0           | 0.695335                | 0.066375  | -0.075620 |
| 5             | 6             | 0           | -0.083655               | 1.306035  | 0.041654  |
| 6             | 6             | 0           | -1.427153               | 1.311838  | -0.055833 |
| 7             | 1             | 0           | -2.542772               | -0.104660 | -1.221288 |

|    |   |   |           |           |           |
|----|---|---|-----------|-----------|-----------|
| 8  | 1 | 0 | -1.356896 | -1.095966 | 1.430030  |
| 9  | 1 | 0 | 0.527092  | -2.060534 | 0.094885  |
| 10 | 1 | 0 | 0.479534  | 2.221353  | 0.203382  |
| 11 | 1 | 0 | -1.960122 | 2.259747  | -0.005907 |
| 12 | 1 | 0 | -0.189290 | -1.411174 | -1.383818 |
| 13 | 1 | 0 | -2.016681 | -2.094029 | 0.131729  |
| 14 | 1 | 0 | -3.181268 | 0.168360  | 0.387559  |
| 15 | 1 | 0 | 1.557743  | 0.180923  | -1.051310 |
| 16 | 8 | 0 | 1.812160  | -0.005643 | 0.770804  |
| 17 | 8 | 0 | 2.718686  | 0.001687  | -0.423599 |

### 12 C<sub>1</sub>

Standard orientation:

| Center<br>Number | Atomic<br>Number | Atomic<br>Type | Coordinates (Angstroms) |           |           |
|------------------|------------------|----------------|-------------------------|-----------|-----------|
|                  |                  |                | X                       | Y         | Z         |
| 1                | 6                | 0              | 2.247656                | -0.711840 | 0.082087  |
| 2                | 6                | 0              | 0.963480                | -1.461333 | -0.301059 |
| 3                | 6                | 0              | -0.268101               | -0.828754 | 0.361154  |
| 4                | 6                | 0              | -0.368485               | 0.660874  | 0.073614  |
| 5                | 6                | 0              | 0.897294                | 1.399725  | -0.079605 |
| 6                | 6                | 0              | 2.090207                | 0.778482  | -0.051229 |
| 7                | 1                | 0              | 2.529314                | -0.942418 | 1.122949  |
| 8                | 1                | 0              | 0.843600                | -1.426792 | -1.391763 |
| 9                | 1                | 0              | -1.205530               | -1.305873 | 0.060923  |
| 10               | 1                | 0              | 0.811884                | 2.476713  | -0.196404 |
| 11               | 1                | 0              | 3.000716                | 1.372375  | -0.123441 |
| 12               | 1                | 0              | -0.195743               | -0.934190 | 1.455650  |
| 13               | 1                | 0              | 1.040725                | -2.518488 | -0.024556 |
| 14               | 1                | 0              | 3.092812                | -1.049280 | -0.531217 |
| 15               | 1                | 0              | -2.955606               | 0.155291  | -0.039924 |
| 16               | 8                | 0              | -1.448750               | 1.247870  | 0.011389  |
| 17               | 8                | 0              | -3.593060               | -0.604152 | -0.116638 |

### 13 C<sub>1</sub>

Standard orientation:

| Center<br>Number | Atomic<br>Number | Atomic<br>Type | Coordinates (Angstroms) |           |           |
|------------------|------------------|----------------|-------------------------|-----------|-----------|
|                  |                  |                | X                       | Y         | Z         |
| 1                | 6                | 0              | -1.819134               | 0.093660  | 0.131885  |
| 2                | 6                | 0              | -1.075866               | -1.163638 | -0.342485 |
| 3                | 6                | 0              | 0.328718                | -1.243373 | 0.271427  |



|    |   |   |           |           |           |
|----|---|---|-----------|-----------|-----------|
| 4  | 6 | 0 | 1.143295  | 0.022378  | 0.017904  |
| 5  | 6 | 0 | 0.380531  | 1.289621  | -0.051952 |
| 6  | 6 | 0 | -0.960786 | 1.326041  | 0.025528  |
| 7  | 1 | 0 | -2.743244 | 0.236084  | -0.443072 |
| 8  | 1 | 0 | -1.652489 | -2.063132 | -0.098050 |
| 9  | 1 | 0 | 0.974024  | 2.195331  | -0.147430 |
| 10 | 1 | 0 | -1.471135 | 2.288807  | 0.014823  |
| 11 | 1 | 0 | -0.988027 | -1.130393 | -1.436480 |
| 12 | 1 | 0 | -2.140484 | -0.025425 | 1.179885  |
| 13 | 1 | 0 | 0.898714  | -2.099017 | -0.103304 |
| 14 | 1 | 0 | 0.251538  | -1.365250 | 1.363325  |
| 15 | 8 | 0 | 2.361320  | 0.001858  | -0.080443 |

-----

**OH C<sub>ov</sub>**

Standard orientation:

| Center<br>Number | Atomic<br>Number | Atomic<br>Type | Coordinates (Angstroms) |          |           |
|------------------|------------------|----------------|-------------------------|----------|-----------|
|                  |                  |                | X                       | Y        | Z         |
| 1                | 8                | 0              | 0.000000                | 0.000000 | 0.109192  |
| 2                | 1                | 0              | 0.000000                | 0.000000 | -0.873537 |

-----

Reference

(1) Wu, X.; Gorden, A. E. V.; Tonks, S. A.; Vilseck, J. Z. *J. Org. Chem.* **2007**, *72*, 8691-8699.
